1 Title:

2 **Group I p21-activated kinases (PAKs) are largely dispensable for insulin-stimulated glucose**  
3 **uptake in mouse skeletal muscle**

4 Lisbeth L. V. Møller<sup>1</sup>, Merna Jaurji<sup>1</sup>, Rasmus Kjøbsted<sup>1</sup>, Giselle A. Joseph<sup>2</sup>, Agnete B. Madsen<sup>1</sup>, Jonas R. Knudsen<sup>1</sup>,  
5 Annemarie Lundsgaard<sup>1</sup>, Nicoline R. Andersen<sup>1</sup>, Peter Schjerling<sup>3,4</sup>, Thomas E. Jensen<sup>1</sup>, Robert S. Krauss<sup>2</sup>, Erik A.  
6 Richter<sup>1\*</sup>, and Lykke Sylow<sup>1\*</sup>

7

8 <sup>1</sup> Section of Molecular Physiology, Department of Nutrition, Exercise and Sports, Faculty of Science, University of  
9 Copenhagen, Denmark

10 <sup>2</sup> Department of Cell, Developmental, and Regenerative Biology, Icahn School of Medicine at Mount Sinai, New York,  
11 NY 10029 USA

12 <sup>3</sup> Institute of Sports Medicine, Department of Orthopedic Surgery M, Bispebjerg Hospital, Denmark

13 <sup>4</sup> Center for Healthy Aging, Faculty of Health Sciences, University of Copenhagen, Denmark

14

15 *\*Corresponding authors and persons to who reprint requests should be addressed. Authors contributed*  
16 *equally.*

17 *Lykke Sylow, Lshansen@nexs.ku.dk, phone +4520955250*

18 *Erik Arne Richter, Erichter@nexs.ku.dk, phone +4528751626*

19 *Universitetsparken 13, 2100 Copenhagen Oe, Denmark*

20

21 Short title: Group I PAKs and insulin-stimulated skeletal muscle glucose uptake

22

23 Number of figures: 7 (+ 6 supplemental figures)

## 24 **Non-standard abbreviations**

- 25 2DG: 2-Deoxyglucose
- 26 AUC: Area under the curve
- 27 BCA: Bicinchoninic acid
- 28 BW: Body weight
- 29 dKO: Double knockout
- 30 EDL: Extensor digitorum longus
- 31 FM: Fat mass
- 32 GLUT4: Glucose transporter 4
- 33 GTT: Glucose tolerance test
- 34 HFD: High-fat diet
- 35 HOMA-IR: Homeostatic Model Assessment of Insulin Resistance
- 36 ITT: Insulin tolerance test
- 37 i.p.: Intraperitoneal
- 38 KO: Knockout
- 39 L6-GLUT4myc: Rat L6 skeletal muscle cells overexpressing myc-tagged GLUT4
- 40 LBM: Lean body mass
- 41 mKO: Muscle-specific knockout
- 42 NOX: NADPH oxidase
- 43 PAK: p21-activated kinase
- 44 PI3K: Phosphoinositide 3-kinase
- 45 RER: Respiratory exchange ratio
- 46 r.o.: Retro-orbital
- 47 VO<sub>2</sub>: Oxygen uptake

48 **Abstract**

49 Glucose transport into skeletal muscle is essential for maintaining whole-body glucose homeostasis  
50 and accounts for the majority of glucose disposal in response to insulin. The group I p21-activated  
51 kinase (PAK) isoforms PAK1 and PAK2 have been shown to be activated in response to insulin in  
52 skeletal muscle. Moreover, PAK1/2 signalling is impaired in insulin-resistant mouse and human  
53 skeletal muscle and PAK1 has been suggested to be required for insulin-stimulated GLUT4  
54 translocation. However, the relative contribution of PAK1 and PAK2 to insulin-stimulated glucose  
55 uptake in mature skeletal muscle is unresolved. The aim of the present investigation was to  
56 determine the requirement for PAK1 and PAK2 in whole-body glucose homeostasis and insulin-  
57 stimulated glucose uptake in skeletal muscle. Glucose uptake was measured in isolated skeletal  
58 muscle incubated with a pharmacological inhibitor (IPA-3) of group I PAKs and in muscle from  
59 whole-body PAK1 knockout (KO), muscle-specific PAK2 (m)KO and double whole-body PAK1  
60 and muscle-specific PAK2 knockout mice. The whole-body respiratory exchange ratio, indicative  
61 of substrate utilization, was largely unaffected by lack of PAK1 and/or PAK2. Whole-body glucose  
62 tolerance was mildly impaired in PAK2 mKO, but not PAK1 KO mice. In contrast to a previous  
63 study of GLUT4 translocation in PAK1 KO mice, PAK1 KO muscles displayed normal insulin-  
64 stimulated glucose uptake *in vivo* and in isolated muscle. On the contrary, glucose uptake was  
65 slightly reduced (-12-18%) in response to insulin in glycolytic extensor digitorum longus muscle  
66 lacking PAK2. In conclusion, group I PAKs are largely dispensable for the regulation of whole-  
67 body glucose homeostasis and skeletal muscle glucose uptake. Thus, the present study challenges  
68 that group I PAKs, and especially PAK1, are necessary regulators of insulin-stimulated glucose  
69 uptake in skeletal muscle.

## 70 **Introduction**

71 The skeletal muscles act as a major glucose sink for disposal of glucose from the blood and are  
72 therefore essential in maintaining whole-body glucose homeostasis. It is important to understand the  
73 mechanisms regulating glucose uptake by skeletal muscle, in part because skeletal muscles account  
74 for the majority of insulin-mediated whole-body glucose disposal [1,2] and muscle insulin  
75 resistance is an early defect in the pathophysiology of peripheral insulin resistance and type 2  
76 diabetes mellitus [1,3].

77 Insulin stimulates glucose uptake in skeletal muscle by activation of a signalling cascade that leads  
78 to the translocation of glucose transporter (GLUT)4-containing vesicles to the sarcolemma and  
79 transverse tubuli [4]. This signalling cascade has been proposed to include activation of p21-  
80 activated kinase 1 (PAK1) downstream of PI3K [5–7]. PAKs are serine/threonine kinases and  
81 PAK1, PAK2 and PAK3 constitute the group I PAKs. Group I PAKs have been extensively studied  
82 as part of numerous signalling networks that regulate essential cellular activities, including cell  
83 proliferation, differentiation, apoptosis, and cytoskeleton dynamics [8,9]. PAKs are downstream  
84 targets of the Rho GTPases Cdc42 and Rac1 [10]. Previous studies suggest that only PAK1 and  
85 PAK2 are expressed in skeletal muscle, whereas PAK3 mRNA and protein expression is below the  
86 detection limit [6,8,11]. In muscle cells and mouse skeletal muscle, PAK1 is proposed to be  
87 required for GLUT4 translocation in response to insulin stimulation [6,7], likely downstream of  
88 Rac1 [12–17]. Thus, together with Akt, proposed to regulate GLUT4 translocation via  
89 phosphorylation of the Rab GTPase-activating protein TBC1D4 [18–20], Rac1-PAK1 activation is  
90 suggested to be necessary for insulin-stimulated GLUT4 translocation.

91 Upon activation of PAK1 and PAK2, conformational changes allow autophosphorylation of T423  
92 and T402, respectively, thereby relieving the autoinhibition of PAK1 and PAK2 [10,21,22]. In

93 vastus lateralis muscle from subjects with obesity and type 2 diabetes, phosphorylation of PAK1/2  
94 at T423/402 in response to insulin was 50% reduced compared to healthy controls [15]. Likewise,  
95 insulin-stimulated pPAK1/2 T423/402 was diminished in palmitate-treated insulin-resistant L6  
96 myotubes, even though upstream of PAK1/2, insulin-stimulated Rac1-GTP binding (i.e. activation)  
97 was not impaired [23]. Together, these studies [15,23] associate dysregulated activity of PAK1 and  
98 PAK2 with insulin resistance. In addition, a pharmacological inhibitor of group I PAKs, IPA-3  
99 abolished insulin-stimulated GLUT4 translocation and glucose uptake into L6 myoblasts and  
100 myotubes, respectively, overexpressing myc-tagged GLUT4 (L6-GLUT4myc) [6]. This indicates  
101 that group I PAKs are required for insulin-stimulated glucose uptake. This effect has largely been  
102 ascribed to PAK1, as whole-body genetic ablation of PAK1 in mice impaired glucose tolerance  
103 [7,24] and blocked insulin-stimulated GLUT4 translocation in skeletal muscle [7]. Further  
104 supporting PAK1 being the major PAK isoform regulating GLUT4 translocation, insulin-stimulated  
105 GLUT4 translocation was unaffected by a 75% knockdown of PAK2 in L6-GLUT4myc myoblasts  
106 [6]. The suggested downstream mechanisms whereby PAK1 regulates GLUT4 translocation include  
107 simultaneous cofilin-mediated actin depolymerization and N-WASP-cortactin-mediated actin  
108 polymerization [6,25,26].

109 Although such studies implicate group I PAKs, and in particular PAK1, in the regulation of glucose  
110 homeostasis and GLUT4 translocation in skeletal muscle, the relative role of PAK1 and PAK2 in  
111 insulin-stimulated glucose uptake remains to be identified in mature skeletal muscle. Therefore, we  
112 performed a systematic series of pharmacologic and genetic experiments to analyze the involvement  
113 of group I PAKs in the regulation of insulin-stimulated glucose uptake in mouse skeletal muscle.  
114 We hypothesized that group I PAKs, and in particular PAK1, would be necessary for glucose  
115 uptake in response to insulin. Contradicting our hypothesis, our results revealed that group I PAKs  
116 are largely dispensable for insulin-stimulated glucose uptake in skeletal muscle.

117

## 118 **Results**

119 *Pharmacological inhibition of group I PAKs partially reduces insulin-stimulated glucose uptake in*  
120 *mouse soleus muscle.* To investigate the involvement of group I PAKs in insulin-stimulated glucose  
121 uptake in mouse skeletal muscle, we first analyzed 2DG uptake in isolated soleus and extensor  
122 digitorum longus (EDL) muscle in the presence of a pharmacological inhibitor, IPA-3. While  
123 glucose uptake *in vivo* is influenced by glucose delivery, GLUT4 translocation and muscle  
124 metabolism [27], glucose delivery is constant in isolated skeletal muscle and surface membrane  
125 GLUT4 is the limiting factor [28–30]. Therefore, 2-Deoxyglucose (2DG) uptake in isolated muscles  
126 likely reflects GLUT4 translocation. IPA-3 is a well-characterized inhibitor of group I PAKs  
127 (PAK1-3) [6,31] and shown to completely abolish insulin-stimulated GLUT4 translocation and  
128 glucose uptake in L6-GLUT4myc myoblasts and myotubes, respectively [6]. In soleus, 2DG uptake  
129 increased 4.5-fold upon maximal insulin-stimulation, an increase that was partly reduced (-20%) in  
130 IPA-3-treated muscles (Fig. 1A). IPA-3 did not significantly ( $p=0.080$ ) impair insulin-stimulated  
131 (+2.4-fold) 2DG uptake in EDL muscle (Fig. 1B). We confirmed that IPA-3 treatment abolished  
132 insulin-stimulated phosphorylation of (p)PAK1 T423 in both soleus and EDL muscle (Fig. 1C+D).  
133 In contrast, insulin-stimulated pAkt T308 (Fig. 1E+F) and pAkt S473 (Fig. 1G+H) were unaffected  
134 by IPA-3 treatment, suggesting that IPA-3 did not interfere with insulin signalling to Akt.  
135 Altogether this suggests that group I PAKs are only partially involved in insulin-stimulated glucose  
136 uptake in isolated mouse muscle.

137 *PAK1 knockout does not affect whole-body glucose tolerance or insulin-stimulated glucose uptake*  
138 *in isolated skeletal muscle.* We next sought to confirm our findings in mice with whole-body lack of  
139 the PAK1 isoform (PAK1 KO) and therefore a complete knockout of PAK1 in skeletal muscle (Fig.

140 2A). In chow-fed mice, fat mass, lean body mass, body weight and energy intake (Fig. 2B-C) were  
141 similar between whole-body PAK1 KO and littermate controls, as also reported previously [33].  
142 During a glucose tolerance test (GTT), the lack of PAK1 had no effect on the blood glucose  
143 response (Fig. 2D-E) or plasma insulin concentration (Fig. 2F). Additionally, Homeostatic Model  
144 Assessment of Insulin Resistance (HOMA-IR), a measure of basal glucose homeostasis (Fig. 2G),  
145 and both submaximal and maximal insulin-stimulated 2DG uptake in isolated soleus and EDL  
146 muscle were unaffected by PAK1 KO (Fig. 2H-I). Thus, unexpectedly, genetic ablation of PAK1  
147 alone did not impair whole-body glucose tolerance, or skeletal muscle insulin sensitivity  
148 (submaximal insulin-stimulated glucose uptake) or insulin responsiveness (maximal insulin-  
149 stimulated glucose uptake) in divergence to previous reports [6,7,9].

150 *PAK1 is not required for insulin-stimulated glucose uptake in lean or diet-induced insulin-resistant*  
151 *mice in vivo.* Our findings on insulin-stimulated glucose uptake in isolated muscle from chow-fed  
152 PAK1 KO mice conflicted with a previous study reporting impaired glucose tolerance in PAK1 KO  
153 mice and defects in insulin-stimulated GLUT4 translocation in skeletal muscle *in vivo* [7].  
154 Therefore, we further explored the effect of PAK1 KO on insulin-stimulated glucose uptake in  
155 skeletal muscle *in vivo*. Additionally, we fed a subgroup of PAK1 KO and control littermate mice a  
156 60E% high-fat diet (HFD) for 21 weeks to investigate the role of PAK1 in insulin-resistant muscle.  
157 Insulin administration lowered blood glucose by  $5.4 \pm 0.5$  mM (-47%) in chow-fed control mice  
158 (Fig. 3A). In HFD-fed control mice, blood glucose dropped  $3.0 \pm 0.9$  mM (-26%) upon insulin  
159 administration (Fig. 3B). Lack of PAK1 had no impact on either basal blood glucose or whole-body  
160 insulin tolerance on either of the diets (Fig. 3A-B). Insulin increased glucose uptake in muscles  
161 from chow-fed (Gastrocnemius: 8.1-fold; Quadriceps: 8.5-fold, Triceps brachii: 12.3-fold; Soleus:  
162 8.9-fold) and HFD-fed (Gastrocnemius: 3.5-fold; Quadriceps: 1.8-fold, Triceps brachii: 4.3-fold;  
163 Soleus: 11.6-fold) control mice (Fig. 3C-D). Consistent with our findings in isolated muscle, we

164 observed no effect of PAK1 KO on basal or insulin-stimulated glucose uptake *in vivo* in muscle of  
165 either chow-fed mice or in insulin-resistant muscles from HFD-fed mice. Like glucose uptake, 2DG  
166 clearance from the plasma was unaffected by PAK1 KO in all of the investigated muscles (Fig.  
167 S1A-B). Importantly, circulating [<sup>3</sup>H]-2DG availability was unaffected by genotype on both of the  
168 diets (Fig. S1C). As in chow-fed mice, lack of PAK1 in HFD-fed mice had no effect on fat mass,  
169 lean body mass, body weight or energy intake (Fig. S1D-E). Similarly, whole-body glucose  
170 tolerance (Fig. S1F-G), plasma insulin concentration during the GTT (Fig. S1H) and HOMA-IR  
171 (Fig. S1I) were unaffected by PAK1 KO in HFD-fed mice. Thus, PAK1 is dispensable for *in vivo*  
172 insulin-stimulated muscle glucose uptake in both the healthy lean and the diet-induced insulin-  
173 resistant state.

174 *Whole-body substrate utilization is unaffected by genetic ablation of PAK1 and PAK2.* Because of  
175 discrepancies in the data resulting from the use of a global pharmacological inhibitor of group I  
176 PAKs and data resulting from PAK1 KO mice, we next sought to determine the relative  
177 contribution and involvement of PAK1 and PAK2 in insulin signalling and glucose uptake in  
178 skeletal muscle. Double knockout mice with whole-body knockout of PAK1 and muscle-specific  
179 knockout of PAK2 (1/m2 dKO) were generated as previously described [8]. By crossing 1/m2 dKO  
180 mice with littermate controls, a cohort was generated consisting of whole-body PAK1 KO, muscle-  
181 specific PAK2 (m)KO, 1/m2 dKO and littermate control mice. While no band for PAK1 could be  
182 detected in muscles lacking PAK1, muscles lacking PAK2 displayed only a partial reduction in  
183 band intensity in the immunoblots for PAK2 (Fig. 4A). This is likely due to the fact that PAK1 KO  
184 mice are whole-body knockouts, while PAK2 mKO mice are muscle-specific and other cell types  
185 within skeletal muscle tissue could thus contribute to the signal obtained in the PAK2 immunoblots.  
186 In a previous study, PAK3 was not detectable at the protein level in 1/m2 dKO muscle [8].



187 As previously shown [8,34], 1/m2 dKO mice weighed less (-12%) than control littermates (Fig. 4B,  
188 Fig. S2A-B) due to reduced (-12%) lean body mass (Fig. 4C, Fig. S2C-D). Body weight and lean  
189 body mass decreased to the same extent in 1/m2 dKO mice, leaving lean body mass percentage  
190 largely unaffected (Fig. S2E-G). Using calorimetric chambers, we monitored whole-body  
191 metabolism for 72 hours during the light and dark period. On day 2, the mice fasted during the dark  
192 period followed by refeeding on day 3. Oxygen uptake ( $VO_2$ ; Fig. 4D, Fig. S3A-B) and respiratory  
193 exchange ratio indicative of substrate utilization (RER; Fig. 4E, Fig. S3C-D) were largely  
194 unaffected by genotype with only a slightly higher RER in mice lacking PAK2 (PAK2 mKO and  
195 1/m2 dKO mice) upon fasting. Similar substrate utilization was obtained despite reduced habitual  
196 activity in the dark period in mice lacking PAK2, an effect largely driven by a decreased activity in  
197 d1/2KO mice and an increased activity in male PAK1 KO mice (Fig. 4F; Fig. S3E-F). Supporting  
198 the lower activity levels, energy intake was decreased (-11%) in 1/m2 dKO mice compared to  
199 PAK1 KO mice on day 1 (Fig. S3G) due to lower energy intake in the dark period (Fig. 4G). Upon  
200 refeeding, energy intake was reduced in mice lacking PAK2 (Fig. 4G; Fig. S3G) driven by a lower  
201 energy intake in the dark period in female mice lacking PAK2 (Fig. S3H-K). Altogether, these data  
202 suggest that lack of PAK1 and/or PAK2 are not compromising metabolic regulation during the  
203 light/dark period or in response to fasting/refeeding.

204 *Glucose tolerance is slightly reduced in mice lacking PAK2 in skeletal muscle.* To test dependency  
205 on PAK1 and/or PAK2 in glucose handling and insulin sensitivity, we next investigated glucose and  
206 insulin tolerance in the 1/m2 dKO mouse strain. Blood glucose concentration in the fed state was  
207 similar between the genotypes (Fig. 5A, Fig. S4A-B). The blood glucose response to a glucose load  
208 was slightly increased in mice lacking PAK2 in skeletal muscle as evident by the increased area  
209 under the blood glucose curve (Fig. 5B-C). This was primarily driven by impaired glucose tolerance  
210 in female PAK2 mKO mice (Fig. S4C-F). Plasma insulin concentration during the GTT was

211 unaffected by lack of PAK1 (Fig. 5D) In contrast, plasma insulin in male PAK2 mKO mice was  
212 slightly elevated compared to 1/m2 dKO mice and tended ( $p=0.055$ ) to be higher than control  
213 littermates (Fig. S4G-H). This indicates impaired insulin sensitivity in male PAK2 mKO mice, but  
214 HOMA-IR was unaffected by lack of PAK1 and/or PAK2 (Fig. 5E, Fig. S5A-B). In addition, even  
215 though fasted blood glucose immediately before an insulin tolerance test (ITT) was modestly  
216 reduced in PAK2 mKO mice (Fig. S5C-E), the blood glucose response to an ITT was largely  
217 unaffected by lack of either PAK1 and/or PAK2 (Fig. 5F, Fig. S5F-G). Thus, despite slightly  
218 impaired glucose tolerance in mice lacking PAK2 in skeletal muscle, neither adverse effects on  
219 plasma insulin nor defects in insulin sensitivity could be detected.

220 *Insulin-stimulated glucose uptake relies partially on PAK2 in EDL, but not soleus muscle, while*  
221 *PAK1 is not involved.* To determine the relative contribution and involvement of PAK1 and PAK2  
222 in glucose uptake in skeletal muscle, we next investigated insulin-stimulated 2DG uptake in isolated  
223 soleus and EDL. To our surprise, soleus muscle lacking PAK1 and PAK2 displayed normal insulin-  
224 stimulated 2DG uptake compared to control littermates (Fig. 6A,C). In contrast, lack of PAK2 in  
225 EDL muscle caused a modest reduction (PAK2 mKO: -18%; d1/2KO: -12%) in insulin-stimulated  
226 2DG uptake (Fig. 6B,D). Thus, in oxidative soleus muscle, group I PAKs are dispensable for  
227 normal insulin-stimulated glucose uptake, whereas in glycolytic EDL muscle PAK2 plays a minor  
228 role.

229 *PAK2 regulates TBC1D4 protein expression and signalling.* Lastly, we looked into the effects of  
230 PAK1 and PAK2 on insulin-stimulated signalling. All groups displayed normal basal and insulin-  
231 stimulated pAkt S473 (Fig. 7A-B, Fig. S6A-B) and pAkt T308 (Fig. 7C-D, Fig. S6C-D) and Akt2  
232 protein expression (Fig. S6E-F) compared to control littermates in both soleus and EDL muscle. In  
233 contrast, lack of PAK2 increased protein expression of Akt's downstream target, TBC1D4 in soleus  
234 muscle (PAK2 mKO: +47%; d1/2KO: +20%) (Fig. 7E), while reducing TBC1D4 expression in

235 EDL (PAK2 mKO: -33%; d1/2KO: -9%) (Fig. 7F). In soleus, basal and insulin-stimulated  
236 pTBC1D4 T642 was similar in all groups (Fig. 7G, Fig. S6G), suggesting that even with increased  
237 TBC1D4 expression, signalling through this pathway was normal. Concomitant with the decreased  
238 TBC1D4 expression in EDL muscle, lack of PAK2 reduced insulin-stimulated pTBC1D4 T642  
239 (Fig. 7H, Fig. S6H) driven by attenuated (-46%) insulin-stimulated pTBC1D4 T642 in PAK2 mKO  
240 mice compared to control littermates (Fig. S6H). Knockout of TBC1D4 has been associated with  
241 lower GLUT4 protein abundance in some muscles [35,36]. Whereas GLUT4 protein expression was  
242 normal in soleus (Fig. 7I), GLUT4 protein expression was mildly reduced in EDL in PAK2 mKO  
243 mice compared to littermate control (Fig. 7J). Thus, the slightly reduced insulin-stimulated glucose  
244 uptake in EDL muscle lacking PAK2 was concomitant with downregulated TBC1D4 signalling and  
245 GLUT4 expression supporting a role for PAK2, but not PAK1, in insulin-stimulated glucose  
246 uptake.

247

## 248 **Discussion**

249 We here undertook a systematic investigation into the requirement of the group I PAK isoforms in  
250 muscle glucose uptake and whole-body metabolic regulation. In contrast to previous literature, our  
251 results show that PAK1 is dispensable for insulin-stimulated glucose uptake in skeletal muscle,  
252 while PAK2 may play a minor role. Using a cohort of whole-body PAK1 KO mice and another  
253 cohort of transgenic mice lacking either PAK1 (whole-body), PAK2 (muscle-specific), or jointly  
254 lacking both PAK1 and muscle PAK2, we show that PAK1 is not required in insulin-stimulated  
255 muscle glucose uptake *in vivo* or in isolated muscles. In accordance, we found no effect of whole-  
256 body PAK1 KO on glucose tolerance in either mice fed a standard chow diet (insulin sensitive  
257 mice) or in mice fed a HFD (insulin-resistant mice). In contrast, PAK2 seemed partially involved in

258 insulin-stimulated glucose uptake in EDL muscle. This could potentially explain the slightly  
259 impaired glucose tolerance with the muscle-specific knockout of PAK2 in mice. Nevertheless,  
260 supporting only a minor role for skeletal muscle PAK2 in the whole-body substrate utilization, RER  
261 was largely unaffected by lack of PAK1 and/or PAK2 and only slightly elevated in mice lacking  
262 PAK2 when challenged by fasting.

263 In a previous study, the increase in GLUT4 abundance at the plasma membrane in response to  
264 insulin measured was completely abrogated in PAK1 KO muscle as measured by subcellular  
265 fractionation of homogenates of hindlimb skeletal muscles [7], suggesting that PAK1 is necessary  
266 for insulin-stimulated GLUT4 translocation. Although glucose uptake was not assessed in that study  
267 [7], this indicated a key role for PAK1 in regulating glucose uptake in mouse skeletal muscle.  
268 Surprisingly, PAK1 was not required for insulin-stimulated glucose uptake in our hands.  
269 Furthermore, in our study, both chow- and HFD-fed PAK1 KO mice displayed blood glucose  
270 concentrations similar to control littermates during a GTT. This was in contrast to previous studies  
271 reporting impaired glucose tolerance in chow-fed PAK1 KO mice [7,24] and elevated fasting blood  
272 glucose in PAK1 KO mice fed a western diet (45E% fat) [33]. Instead, despite the previous finding  
273 that insulin-stimulated GLUT4 translocation was unaffected by a 75% knockdown of PAK2 in L6-  
274 GLUT4myc myoblasts [6], we found that muscle-specific PAK2 KO slightly impaired glucose  
275 tolerance and insulin-stimulated glucose in mouse skeletal muscle. These discrepancies between our  
276 and previous findings are difficult to delineate but might be due to methodological differences.  
277 Wang et al. [7] used a crude fractionation method to measure GLUT4 translocation, whereas we  
278 analyzed the direct outcome hereof: glucose uptake. Although the insulin-induced increase in 3-O-  
279 methylglucose transport correlates with the increase in cell surface GLUT4 protein content in  
280 human skeletal muscle strips [40], discrepancies between the presence of GLUT4 at the plasma  
281 membrane and glucose uptake have occasionally been reported in cell culture studies [37–39].

282 Another potential explanatory factor could be that our studies were conducted in both female and  
283 male mice, whereas past studies in PAK1 KO mice have been conducted in 4-6 months old male  
284 mice [7,33]. However, our data suggest no major differences between female and male mice in the  
285 response to lack of PAK1 and/or PAK2 on the whole-body metabolic parameters measured. Instead,  
286 the discrepancies between our and previous findings could be due to an effect of age, as our studies  
287 were conducted in mice at different ranges of age (10-37 of weeks age at the terminal experiment).  
288 In fact, age-dependent myopathy and development of megaconial mitochondria have been reported  
289 in the 1/m2 dKO mice [34]. Regardless, even though a role for group I PAKs in age-related insulin  
290 resistance should be further investigated, our investigation suggests that group I PAKs are  
291 dispensable in regulating whole-body glucose homeostasis or insulin-stimulated glucose uptake in  
292 skeletal muscle.

293 In the current study, pharmacological inhibition of group I PAKs inhibited muscle glucose uptake in  
294 response to insulin. Similarly, IPA-3 previously inhibited insulin-stimulated GLUT4 translocation  
295 and glucose uptake in L6-GLUT4myc myoblasts and myotubes, respectively [6]. IPA-3 is a non-  
296 ATP-competitive allosteric inhibitor of all group I PAKs (PAK1, 2, and 3). IPA-3 binds covalently  
297 to the regulatory CRIB domain of group I PAKs, thereby preventing binding to PAK activators,  
298 such as Rac1 [31]. Although IPA-3 is reported to be a highly selective and well-described inhibitor  
299 of group I PAKs that does not affect other groups of PAKs or similar kinases tested [31],  
300 pharmacological inhibitors often have off-target effects [32] which is a concern. It is also possible  
301 that acute IPA-3-induced inhibition of group I PAKs elicits more potent effects compared with  
302 jointly knockout of PAK1 and PAK2 because the transgenic manipulations have been present from  
303 birth and may thus have resulted in compensatory changes. The development of inducible muscle-  
304 specific group I PAK deficient models could help clarify this. Importantly, any possible  
305 compensatory mechanisms cannot be via redundancy with group I PAKs, as PAK1 and PAK2 are

306 removed genetically, and even in 1/m2 dKO mice, PAK3 cannot be detected at the protein level [8].  
307 This emphasizes that group I PAKs are largely dispensable for insulin-stimulated glucose uptake in  
308 skeletal muscle.

309 Our hypothesis was that group I PAKs would be significantly involved in insulin-stimulated  
310 glucose uptake because of the established necessity of their upstream activator, Rac1 [12–17]. Our  
311 findings suggest that Rac1 does not exclusively mediate insulin-stimulated glucose uptake through  
312 group I PAKs. Another downstream target of Rac1 is RalA. GLUT4 translocation induced by a  
313 constitutively activated Rac1 mutant was abrogated in L6-GLUT4myc myoblasts upon RalA  
314 knockdown [41] and, importantly, overexpression of a dominant-negative mutant of RalA reduced  
315 GLUT4 translocation in response to insulin in mouse gastrocnemius muscle fibres [42].  
316 Additionally, Rac1 is an essential component in the activation of the NADPH oxidase (NOX)  
317 complex [43,44]. In L6-GLUT4myc myotubes, reactive oxygen species have been reported to  
318 induce NOX2-dependent GLUT4 translocation in response to insulin [45]. Insulin-stimulated  
319 NOX2 regulation in mature muscle remains to be investigated. However, a recent study suggested a  
320 role for Rac1 in the regulation of muscle glucose uptake through activation of the NOX2 in  
321 response to exercise [46]. Since Rac1 is required for both contraction- and insulin-stimulated  
322 glucose uptake in isolated mouse muscle [15,47], Rac1 could also be involved in insulin-stimulated  
323 glucose uptake via NOX2 activation. Consequently, future studies should aim to investigate other  
324 players downstream of Rac1 since group I PAKs seem to be largely dispensable for glucose uptake  
325 in mature skeletal muscle.

326 Based on our present findings, we conclude that even though PAK2 may be a minor requirement for  
327 insulin-stimulated glucose uptake in EDL muscle, group I PAKs are largely dispensable in the  
328 regulation of whole-body glucose homeostasis and insulin-stimulated glucose uptake in mouse  
329 skeletal muscle.

330

## 331 **Materials and Methods**

332 *Animal experiments.* Female C57BL/6J mice (Taconic, Denmark) were used for all inhibitor  
333 incubation studies. Mice received standard rodent chow diet (Altromin no. 1324; Brogaarden,  
334 Denmark) and water ad libitum.

335 *Whole-body PAK1<sup>-/-</sup> mice.* Whole-body PAK1<sup>-/-</sup> mice on a C57BL/6J background were generated as  
336 previously described [48]. The mice were obtained by heterozygous crossing. PAK1<sup>-/-</sup> mice  
337 (referred to as PAK1 KO) and paired littermate PAK1<sup>+/+</sup> mice (referred to as controls) were used for  
338 experiments. Female and male mice were used for measurements of body composition, glucose  
339 tolerance and insulin-stimulated glucose uptake in isolated muscle. The mice were 12-24 weeks of  
340 age at the time of tissue dissection and measurement of glucose uptake. Number of mice in each  
341 group: Control,  $n = 6/7$  (female/male); PAK1 KO,  $n = 4/8$ . Mice received standard rodent chow  
342 diet and water ad libitum.

343 For measurement of *in vivo* insulin-stimulated glucose uptake in chow- and 60E% HFD (no.  
344 D12492; Brogaarden, Denmark)-fed PAK1 KO mice, mice were assigned to a chow or HFD group.  
345 Chow-fed mice were 10-24 weeks of age at the time of glucose uptake measurements and tissue  
346 dissection. Number of mice in each group: Control-Chow,  $n = 14/8$  (female/male); PAK1 KO-  
347 Chow,  $n = 6/4$ . For mice receiving HFD, the diet intervention started at 6-16 weeks of age and  
348 lasted for 21 weeks. HFD-fed mice were used for body composition, glucose tolerance and *in vivo*  
349 glucose uptake and were 27-37 weeks of age at the time of glucose uptake measurements and tissue  
350 dissection. Number of mice in each group: Control-HFD,  $n = 7/7$  (female/male); PAK1 KO-HFD,  $n$   
351  $= 11/5$ . Energy intake was measured over a period of 10 weeks in another cohort of mice. Number

352 of mice in each group: Chow,  $n = 8/8$  (Control/PAK1 KO); HFD,  $n = 8/8$ . Mice had access to their  
353 respective diet and water ad libitum.

354 *Double PAK1<sup>-/-</sup>;PAK2<sup>fl/fl</sup>;MyoD<sup>iCre/+</sup> mice.* Double knockout mice with whole-body knockout of  
355 PAK1 and conditional, muscle-specific knockout of PAK2, PAK1<sup>-/-</sup>;PAK2<sup>fl/fl</sup>;MyoD<sup>iCre/+</sup> were  
356 generated as previously described [8]. The mice were on a mixed C57BL/6/FVB background.  
357 PAK1<sup>-/-</sup>;PAK2<sup>fl/fl</sup>;MyoD<sup>iCre/+</sup> were crossed with PAK1<sup>+/-</sup>;PAK2<sup>fl/fl</sup>;MyoD<sup>+/+</sup> to generate littermate  
358 PAK1<sup>-/-</sup>;PAK2<sup>fl/fl</sup>;MyoD<sup>iCre/+</sup> (referred to as 1/m2 dKO), PAK1<sup>-/-</sup>;PAK2<sup>fl/fl</sup>;MyoD<sup>+/+</sup> (referred to as  
359 PAK1 KO), PAK1<sup>+/-</sup>;PAK2<sup>fl/fl</sup>;MyoD<sup>iCre/+</sup> (referred to as PAK2 mKO), and PAK1<sup>+/-</sup>  
360 ;PAK2<sup>fl/fl</sup>;MyoD<sup>+/+</sup> (referred to as controls) used for experiments. Female and male mice were used  
361 for measurement of insulin-stimulated glucose uptake in isolated muscle. The mice were 10-16  
362 weeks of age at the time of tissue dissection and glucose uptake measurements. Number of mice in  
363 each group: Control,  $n = 6/4$  (female/male); PAK1 KO,  $n = 5/4$ , PAK2 mKO,  $n = 6/4$ , d1/2KO,  $n =$   
364  $6/3$ . Another cohort of mice was used for whole-body metabolic measurements. The first  
365 measurement (insulin tolerance) was at 11-24 weeks of age and the last measurement was at 23-33  
366 weeks of age (home cage calorimetry). Number of mice in each group: Control,  $n = 9/11$   
367 (female/male); PAK1 KO,  $n = 8/10$ , PAK2 mKO,  $n = 12/9$ , d1/2KO,  $n = 9/14$ . For some of the  
368 metabolic measurements, only a subgroup of mice was used as indicated in the relevant figure  
369 legends. Mice received standard rodent chow diet and water ad libitum.

370 All animals were maintained on a 12:12-hour light-dark cycle and housed at 22°C (with allowed  
371 fluctuation of  $\pm 2^\circ\text{C}$ ) with nesting material. The mice were group-housed. All animal experiments  
372 complied with the European Convention for the protection of vertebrate animals used for  
373 experimental and other scientific purposes (No. 123, Strasbourg, France, 1985) and were approved  
374 by the Danish Animal Experimental Inspectorate.



375 **Body composition.** Body composition was analyzed using magnetic resonance imaging (EchoMRI-  
376 4in1TM, Echo Medical System LLC, Texas, USA). Chow-fed PAK1 KO and control littermates  
377 were assessed at 7-19 weeks of age. HFD-fed PAK1 KO and control littermates were assessed 18-  
378 19 weeks into the diet intervention (24-34 weeks of age). Chow-fed PAK1 KO, PAK2 mKO, 1/m2  
379 dKO mice and control littermates were assessed at 16-29 weeks of age.

380 **Glucose tolerance test (GTT).** Prior to the test, chow- and HFD-fed PAK1 KO mice and control  
381 littermates fasted for 12 hours from 10 p.m, while chow-fed PAK1 KO, PAK2 mKO, 1/m2 dKO  
382 mice and control littermates fasted for 6 hours from 6 a.m. D-mono-glucose (2 g kg<sup>-1</sup> body weight)  
383 was administered intraperitoneal (i.p) and blood was collected from the tail vein and blood glucose  
384 concentration determined at the indicated time points using a glucometer (Bayer Contour, Bayer,  
385 Switzerland). Incremental Area Under the Curve (AUC) from the basal blood glucose concentration  
386 was determined using the trapezoid rule. For measurement of plasma insulin, glucose was  
387 administered i.p. on a separate experimental day (1-2 weeks after the GTT) and blood was sampled  
388 at time points 0 and 20 minutes, centrifuged and plasma was quickly frozen in liquid nitrogen and  
389 stored at -20°C until processing. Plasma insulin was analyzed in duplicate (Mouse Ultrasensitive  
390 Insulin ELISA, #80-INSTRU-E10, ALPCO Diagnostics, USA). Homeostatic model assessment of  
391 insulin resistance (HOMA-IR) was calculated according to the formula: Fasting plasma insulin (mU  
392 L<sup>-1</sup>) X Fasting blood glucose (mM)/22.5. Glucose tolerance was assessed in 8-20 weeks of age  
393 chow-fed PAK1 KO mice and in week 14 of the diet intervention of HFD-fed PAK1 KO mice (20-  
394 30 weeks of age). In chow-fed PAK1 KO, PAK2 mKO, 1/m2 dKO mice and control littermates,  
395 glucose tolerance was assessed at 13-26 weeks of age.

396 **Insulin tolerance test (ITT).** Prior to the test, chow-fed PAK1 KO, PAK2 mKO, 1/m2 dKO mice  
397 and control littermates fasted for 4 hours from 6 a.m. Insulin (0.5 U kg<sup>-1</sup> body weight) was  
398 administered i.p. and blood was collected from the tail vein and blood glucose concentration

399 determined using a glucometer (Bayer Contour, Bayer, Switzerland) at time point 0, 15, 30, 60, 90  
400 and 120 minutes. For two female control mice and four female PAK2 mKO mice, the ITT had to be  
401 stopped before the 120'-time point due to hypoglycemia (blood glucose <1.2 mM). Thus, blood  
402 glucose was not measured in these mice for the last couple of time points. Insulin tolerance was  
403 assessed in 11-24 weeks of age chow-fed PAK1 KO, PAK2 mKO, 1/m2 dKO mice and control  
404 littermates.

405 ***Home cage indirect calorimetry.*** One week prior to the calorimetric measurements, chow-fed  
406 PAK1 KO, PAK2 mKO, 1/m2 dKO mice and control littermates were single-housed in specialized  
407 cages for indirect gas calorimetry but uncoupled from the PhenoMaster indirect calorimetry system  
408 (TSE PhenoMaster metabolic cage systems, TSE Systems, Germany). After a 2-day acclimation  
409 period coupled to the PhenoMaster indirect calorimetry system, oxygen consumption, CO<sub>2</sub>  
410 production, habitual activity (beam breaks) and food intake were measured for 72 hours (TSE  
411 LabMaster V5.5.3, TSE Systems, Germany). On day 2, mice fasted during the dark period followed  
412 by refeeding on day 3. Respiratory exchange ratio (RER) was calculated as the ratio between CO<sub>2</sub>  
413 production and oxygen consumption. The mice were 23-33 weeks of age.

414 ***Incubation of isolated muscles.*** Soleus and EDL muscles were dissected from anaesthetized mice  
415 (6 mg pentobarbital sodium 100 g<sup>-1</sup> body weight i.p.) and suspended at resting tension (4-5 mN) in  
416 incubations chambers (Multi Myograph System, Danish Myo Technology, Denmark) in Krebs-  
417 Ringer-Henseleit buffer with 2 mM pyruvate and 8 mM mannitol at 30°C, as described previously  
418 [49]. Additionally, the Krebs-Ringer-Henseleit buffer was supplemented with 0.1% BSA (v/v).  
419 Isolated muscles from female C57BL/6J mice were pre-incubated with 40 µM IPA-3 (Sigma-  
420 Aldrich) or as a control DMSO (0.25%) for 25 minutes followed by 30 minutes of insulin  
421 stimulation (60 nM; Actrapid, Novo Nordisk, Denmark). Isolated muscles from chow-PAK1 KO  
422 were pre-incubated for 30 minutes followed by 30 minutes of insulin stimulation (0.6 nm or 60

423 nM). Isolated muscles from chow-fed PAK1 KO, PAK2 mKO, 1/m2 dKO mice or control  
424 littermates were pre-incubated for 20 minutes followed by 20 minutes of insulin stimulation (60  
425 nM). 2DG uptake was measured together with 1 mM 2DG during the last 10 min of the insulin  
426 stimulation period using  $0.6 \mu\text{Ci mL}^{-1}$  [ $^3\text{H}$ ]-2DG and  $0.180 \mu\text{Ci mL}^{-1}$  [ $^{14}\text{C}$ ]-mannitol radioactive  
427 tracers as described previously [49]. Tissue-specific [ $^3\text{H}$ ]-2DG accumulation with [ $^{14}\text{C}$ ]-mannitol as  
428 an extracellular marker was determined as previously described [50].

429 *In vivo insulin-stimulated 2-Deoxyglucose uptake in PAK1 KO mice during a r.o. ITT.* To  
430 determine 2DG uptake in skeletal muscle of PAK1 KO mice and littermate controls, [ $^3\text{H}$ ]-2DG  
431 (Perkin Elmer) was administered retro-orbitally (r.o.) in a bolus of saline containing  $66.7 \mu\text{Ci mL}^{-1}$   
432 [ $^3\text{H}$ ]-2DG ( $\sim 32.4 \text{ Ci/mmol}$ ) corresponding to  $\sim 10 \mu\text{Ci/mouse}$  in chow-fed mice or  $\sim 15 \mu\text{Ci/mouse}$   
433 in HFD-fed mice ( $6 \mu\text{L g}^{-1}$  body weight) as described [17]. The [ $^3\text{H}$ ]-2DG saline bolus was with or  
434 without insulin (Actrapid, Novo Nordisk, Denmark). Decreased insulin clearance has been observed  
435 by us [17] and others in obese rodent [51,52] and human [53] models. Therefore, to correct for  
436 changes in insulin clearance,  $0.5 \text{ U kg}^{-1}$  body weight of insulin was administered in chow-fed mice  
437 whereas only 60% of this dosage was administered to HFD-fed mice. Prior to stimulation, mice  
438 fasted for 4 hours from 07:00 and were anaesthetized ( $7.5/9 \text{ mg [Chow/HFD]}$  pentobarbital sodium  
439  $100 \text{ g}^{-1}$  body weight i.p.) 15 minutes before the r.o. injection. Blood samples were collected from  
440 the tail vein after the r.o. injection and analyzed for glucose concentration using a glucometer  
441 (Bayer Contour, Bayer, Switzerland) at the time points 0, 5 and 10 minutes. After 10 minutes,  
442 skeletal muscle (gastrocnemius, quadriceps, triceps brachii and soleus) were excised, rinsed in  
443 saline, and quickly frozen in liquid nitrogen and stored at  $-80^\circ\text{C}$  until processing. Blood was  
444 collected by punctation of the heart, centrifuged and plasma was quickly frozen in liquid nitrogen  
445 and stored at  $-80^\circ\text{C}$  until processing. Plasma samples were analyzed for insulin concentration and  
446 specific [ $^3\text{H}$ ]-2DG activity. Plasma insulin was analyzed in duplicate (Mouse Ultrasensitive Insulin

447 ELISA, #80-INSTRU-E10, ALPCO Diagnostics, USA). Tissue-specific 2DG-6-phosphate  
448 accumulation was measured as described [54,55]. To determine 2DG clearance from the plasma  
449 into the specific tissue, tissue-specific [<sup>3</sup>H]-2DG-6-P was divided by AUC of the plasma-specific  
450 [<sup>3</sup>H]-2DG activity at the time points 0 and 10 minutes. To estimate tissue-specific glucose uptake  
451 (glucose uptake index), clearance was multiplied by the average blood glucose levels for the time  
452 points 0, 5, and 10 minutes. Tissue-specific 2DG clearance and glucose uptake were related to  
453 analyzed muscle tissue weight and time.

454 **Muscle analyses.** Prior to homogenization, gastrocnemius, quadriceps, and triceps brachii muscles  
455 were pulverized in liquid nitrogen. All muscle were homogenized 2 x 30 sec at 30 Hz using a  
456 Tissuelyser II (Qiagen, USA) in ice-cold homogenization buffer (10% (v/v) Glycerol, 1% (v/v) NP-  
457 40, 20 mM Na-pyrophosphate, 150 mM NaCl, 50 mM HEPES (pH 7.5), 20 mM β-  
458 glycerophosphate, 10 mM NaF, 2mM PMSF, 1 mM EDTA (pH 8.0), 1 mM EGTA (pH 8.0), 2 mM  
459 Na<sub>3</sub>VO<sub>4</sub>, 10 μg mL<sup>-1</sup> Leupeptin, 10 μg mL<sup>-1</sup> Aprotinin, 3 mM Benzamidine). After rotation end-  
460 over-end for 30 min at 4°C, lysate supernatants were collected by centrifugation (10,854-15,630 x  
461 g) for 15-20 min at 4°C.

462 **Immunoblotting.** Lysate protein concentration was determined using the bicinchoninic acid (BCA)  
463 method using BSA standards and BCA assay reagents (Pierce). Immunoblotting samples were  
464 prepared in 6x sample buffer (340 mM Tris (pH 6.8), 225 mM DTT, 11% (w/v) SDS, 20% (v/v)  
465 Glycerol, 0.05% (w/v) Bromphenol blue). Protein phosphorylation (p) and total protein expression  
466 were determined by standard immunoblotting technique loading equal amounts of protein. The  
467 polyvinylidene difluoride membrane (Immobilon Transfer Membrane; Millipore) was blocked in  
468 Tris-Buffered Saline with added Tween20 (TBST) and 2% (w/v) skim milk or 5% (w/v) BSA  
469 protein for 15 minutes at room temperature, followed by incubation overnight at 4°C with a primary  
470 antibody (Table 1). Next, the membrane was incubated with horseradish peroxidase-conjugated

471 secondary antibody (Jackson Immuno Research) for 1 hour at room temperature. Bands were  
472 visualized using Bio-Rad ChemiDoc™ MP Imaging System and enhanced chemiluminescence  
473 (ECL+; Amersham Biosciences). Densitometric analysis was performed using Image Lab™  
474 Software, version 4.0 (Bio-Rad, USA). Coomassie brilliant blue staining was used as a loading  
475 control [56].

476 **Statistical analyses.** Data are presented as mean  $\pm$  S.E.M. or when applicable mean  $\pm$  S.E.M. with  
477 individual data points shown. Statistical tests varied according to the dataset being analyzed and the  
478 specific tests used are indicated in the figure legends. If the null hypothesis was rejected, Tukey's  
479 post hoc test was used to evaluate significant main effects of genotype and significant interactions  
480 in ANOVAs.  $P < 0.05$  was considered statistically significant.  $P < 0.1$  was considered a tendency.  
481 Except for mixed-effects model analyses performed in GraphPad Prism, version 8.2.1. (GraphPad  
482 Software, La Jolla, CA, USA), all statistical analyses were performed using Sigma Plot, version 13  
483 (Systat Software Inc., Chicago, IL, USA). Due to missing values ascribed to hypoglycemia,  
484 differences between genotypes and the effect of insulin administration were assessed with a mixed-  
485 effects model analysis in Fig. 5F and S5F.

486

#### 487 **Disclosure summary**

488 No potential conflicts of interest relevant to this article were reported.

489

#### 490 **Acknowledgements**

491 We thank our colleagues, especially Jørgen Wojtaszewski and Bente Kiens, at the Section of  
492 Molecular Physiology, Department of Nutrition, Exercise, and Sports (NEXS), Faculty of Science,

493 University of Copenhagen, for fruitful discussions on this topic. We acknowledge the skilled  
494 technical assistance of Betina Bolmgren, Irene B. Nielsen, and Mona Ali (Section of Molecular  
495 Physiology, NEXS, Faculty of Science, University of Copenhagen, Denmark). The PAK1 KO  
496 founder mice were a kind gift from Debbie Thurmond (Department of Molecular & Cellular  
497 Endocrinology, Diabetes and Metabolism Research Institute, City of Hope/BRICA, USA).

498

#### 499 **Author contributions**

500 LLVM, EAR, and LS conceptualized and designed the study. LLVM and LS conducted the  
501 experiments and analyzed the data, with experimental contribution and/or interpretation of data  
502 from MJ, RK, GAJ, ABM, JRK, A-ML, NRA, PS, TEJ, RSK. LLVM, EAR, and LS drafted the  
503 manuscript. All authors contributed to the final version of the manuscript. All authors are guarantor  
504 of this work and take responsibility for the integrity of the data and the accuracy of the data  
505 analysis.

506

#### 507 **Grants**

508 This study was supported by a PhD fellowship from The Lundbeck Foundation (grant 2015-3388 to  
509 LLVM); PhD scholarships from The Danish Diabetes Academy, funded by The Novo Nordisk  
510 Foundation (ABM and JRK); Postdoctoral research grant from the Danish Diabetes Academy,  
511 funded by the Novo Nordisk Foundation (grant NNF17SA0031406 to A-ML); National Institute of  
512 Arthritis and Musculoskeletal and Skin Diseases (grant AR046207 and AR070231 to RSK); The  
513 Danish Council for Independent Research, Medical Sciences (grant DFF-4004-00233 to LS, grant  
514 6108-00203 to EAR); The Novo Nordisk Foundation (grant 10429 to EAR, grant 15182 to TEJ,  
515 grant NNF16OC0023418 and NNF18OC0032082 to LS).

516

517

## 518 **References**

- 519 1. DeFronzo RA, Gunnarsson R, Björkman O, Olsson M, Wahren J. Effects of insulin on peripheral and  
520 splanchnic glucose metabolism in noninsulin-dependent (type II) diabetes mellitus. *J Clin Invest.*  
521 1985;76: 149–155. doi:10.1172/JCI111938
- 522 2. Baron AD, Brechtel G, Wallace P, Edelman S V. Rates and tissue sites of non-insulin- and insulin-  
523 mediated glucose uptake in humans. *Am J Physiol Metab.* 1988;255: E769–E774.  
524 doi:10.1152/ajpendo.1988.255.6.E769
- 525 3. Samuel VT, Petersen KF, Shulman GI. Lipid-induced insulin resistance: unravelling the mechanism.  
526 *Lancet.* 2010;375: 2267–2277. doi:10.1016/S0140-6736(10)60408-4
- 527 4. Lauritzen HPMM. Insulin- and Contraction-Induced Glucose Transporter 4 Traffic in Muscle. *Exerc*  
528 *Sport Sci Rev.* 2013;41: 77–86. doi:10.1097/JES.0b013e318275574c
- 529 5. Tsakiridis T, Taha C, Grinstein S, Klip A. Insulin activates a p21-activated kinase in muscle cells via  
530 phosphatidylinositol 3-kinase. *J Biol Chem.* 1996;271: 19664–19667. doi:10.1074/jbc.271.33.19664
- 531 6. Tunduguru R, Chiu TT, Ramalingam L, Elmendorf JS, Klip A, Thurmond DC. Signaling of the p21-  
532 activated kinase (PAK1) coordinates insulin-stimulated actin remodeling and glucose uptake in  
533 skeletal muscle cells. *Biochem Pharmacol.* 2014;92: 380–388. doi:10.1016/j.bcp.2014.08.033
- 534 7. Wang Z, Oh E, Clapp DW, Chernoff J, Thurmond DC. Inhibition or ablation of p21-activated kinase  
535 (PAK1) disrupts glucose homeostatic mechanisms in vivo. *J Biol Chem.* 2011;286: 41359–41367.  
536 doi:10.1074/jbc.M111.291500
- 537 8. Joseph GA, Lu M, Radu M, Lee JK, Burden SJ, Chernoff J, et al. Group I Paks Promote Skeletal  
538 Myoblast Differentiation In Vivo and In Vitro. *Mol Cell Biol.* 2017;37: e00222-16.  
539 doi:10.1128/MCB.00222-16
- 540 9. Chiang YA, Jin T. p21-Activated protein kinases and their emerging roles in glucose homeostasis.  
541 *Am J Physiol Metab.* 2014;306: E707–E722. doi:10.1152/ajpendo.00506.2013
- 542 10. Manser E, Leung T, Salihuddin H, Zhao Z, Lim L. A brain serine/threonine protein kinase activated  
543 by Cdc42 and Rac1. *Nature.* 1994;367: 40–46. doi:10.1038/367040a0
- 544 11. Arvidson AR. A tale of two parks. *Landsc Archit.* 2008;98: 108–117. doi:10.1042/bc20070109
- 545 12. Khayat ZA, Tong P, Yaworsky K, Bloch RJ, Klip A. Insulin-induced actin filament remodeling  
546 colocalizes actin with phosphatidylinositol 3-kinase and GLUT4 in L6 myotubes. *J Cell Sci.*  
547 2000;113 Pt 2: 279–90. Available: <http://www.ncbi.nlm.nih.gov/pubmed/10633079>
- 548 13. JeBailey L, Wanono O, Niu W, Roessler J, Rudich A, Klip A. Ceramide- and oxidant-induced insulin  
549 resistance involve loss of insulin-dependent Rac-activation and actin remodeling in muscle cells.  
550 *Diabetes.* 2007;56: 394–403. doi:10.2337/db06-0823
- 551 14. Ueda S, Kitazawa S, Ishida K, Nishikawa Y, Matsui M, Matsumoto H, et al. Crucial role of the small  
552 GTPase Rac1 in insulin-stimulated translocation of glucose transporter 4 to the mouse skeletal muscle  
553 sarcolemma. *FASEB J.* 2010;24: 2254–2261. doi:10.1096/fj.09-137380
- 554 15. Sylow L, Jensen TE, Kleinert M, Hojlund K, Kiens B, Wojtaszewski J, et al. Rac1 Signaling Is  
555 Required for Insulin-Stimulated Glucose Uptake and Is Dysregulated in Insulin-Resistant Murine and  
556 Human Skeletal Muscle. *Diabetes.* 2013;62: 1865–1875. doi:10.2337/db12-1148

- 557 16. Sylow L, Kleinert M, Pehmøller C, Prats C, Chiu TT, Klip A, et al. Akt and Rac1 signaling are jointly  
558 required for insulin-stimulated glucose uptake in skeletal muscle and downregulated in insulin  
559 resistance. *Cell Signal*. 2014;26: 323–331. doi:10.1016/j.cellsig.2013.11.007
- 560 17. Raun SH, Ali M, Kjøbsted R, Møller LL V, Federspiel MA, Richter EA, et al. Rac1 muscle knockout  
561 exacerbates the detrimental effect of high-fat diet on insulin-stimulated muscle glucose uptake  
562 independently of Akt. *J Physiol*. 2018;596: 2283–2299. doi:10.1113/JP275602
- 563 18. Sano H, Kane S, Sano E, Míinea CP, Asara JM, Lane WS, et al. Insulin-stimulated Phosphorylation  
564 of a Rab GTPase-activating Protein Regulates GLUT4 Translocation. *J Biol Chem*. 2003;278: 14599–  
565 14602. doi:10.1074/jbc.C300063200
- 566 19. Thong FSL, Dugani CB, Klip A. Turning signals on and off: GLUT4 traffic in the insulin-signaling  
567 highway. *Physiology*. American Physiological Society; 2005. pp. 271–284.  
568 doi:10.1152/physiol.00017.2005
- 569 20. Kramer HF, Witczak CA, Taylor EB, Fujii N, Hirshman MF, Goodyear LJ. AS160 Regulates Insulin-  
570 and Contraction-stimulated Glucose Uptake in Mouse Skeletal Muscle. *J Biol Chem*. 2006;281:  
571 31478–31485. doi:10.1074/jbc.M605461200
- 572 21. Benner GE, Dennis PB, Masaracchia RA. Activation of an S6/H4 Kinase (PAK 65) from Human  
573 Placenta by Intramolecular and Intermolecular Autophosphorylation. *J Biol Chem*. 1995;270: 21121–  
574 21128. doi:10.1074/jbc.270.36.21121
- 575 22. Gatti A, Huang Z, Tuazon PT, Traugh JA. Multisite autophosphorylation of p21-activated protein  
576 kinase gamma-PAK as a function of activation. *J Biol Chem*. 1999;274: 8022–8.  
577 doi:10.1074/jbc.274.12.8022
- 578 23. Stierwalt HD, Ehrlicher SE, Bergman BC, Robinson MM, Newsom SA. Insulin-stimulated Rac1-  
579 GTP binding is not impaired by palmitate treatment in L6 myotubes. *Physiol Rep*. 2018;6: e13956.  
580 doi:10.14814/phy2.13956
- 581 24. Chiang YA, Shao W, Xu XX, Chernoff J, Jin T. P21-activated protein kinase 1 (Pak1) mediates the  
582 cross talk between insulin and  $\beta$ -catenin on proglucagon gene expression and its ablation affects  
583 glucose homeostasis in male C57BL/6 mice. *Endocrinology*. 2013;154: 77–88. doi:10.1210/en.2012-  
584 1781
- 585 25. Chiu TT, Patel N, Shaw AE, Bamburg JR, Klip A. Arp2/3- and Cofilin-coordinated Actin Dynamics  
586 Is Required for Insulin-mediated GLUT4 Translocation to the Surface of Muscle Cells. Blanchoin L,  
587 editor. *Mol Biol Cell*. 2010;21: 3529–3539. doi:10.1091/mbc.e10-04-0316
- 588 26. Tunduguru R, Zhang J, Aslamy A, Salunkhe VA, Brozinick JT, Elmendorf JS, et al. The actin-related  
589 p41ARC subunit contributes to p21-activated kinase-1 (PAK1)-mediated glucose uptake into skeletal  
590 muscle cells. *J Biol Chem*. 2017;292: 19034–19043. doi:10.1074/jbc.M117.801340
- 591 27. Wasserman DH, Kang L, Ayala JE, Fueger PT, Lee-Young RS. The physiological regulation of  
592 glucose flux into muscle in vivo. *J Exp Biol*. 2011;214: 254–262. doi:10.1242/jeb.048041
- 593 28. Hansen PA, Gulve EA, Marshall BA, Gao J, Pessin JE, Holloszy JO, et al. Skeletal muscle glucose  
594 transport and metabolism are enhanced in transgenic mice overexpressing the Glut4 glucose  
595 transporter. *J Biol Chem*. 1995;270: 1679–84. doi:10.1074/jbc.270.5.1679
- 596 29. Hansen PA, Marshall BA, Chen M, Holloszy JO, Mueckler M. Transgenic Overexpression of  
597 Hexokinase II in Skeletal Muscle Does Not Increase Glucose Disposal in Wild-type or Glut1-  
598 overexpressing Mice. *J Biol Chem*. 2000;275: 22381–22386. doi:10.1074/jbc.M001946200
- 599 30. Zisman A, Peroni OD, Abel ED, Michael MD, Mauvais-Jarvis F, Lowell BB, et al. Targeted  
600 disruption of the glucose transporter 4 selectively in muscle causes insulin resistance and glucose  
601 intolerance. *Nat Med*. 2000;6: 924–928. doi:10.1038/78693



- 602 31. Deacon SW, Beeser A, Fukui JA, Rennefahrt UEE, Myers C, Chernoff J, et al. An Isoform-Selective,  
603 Small-Molecule Inhibitor Targets the Autoregulatory Mechanism of p21-Activated Kinase. *Chem*  
604 *Biol.* 2008;15: 322–331. doi:10.1016/j.chembiol.2008.03.005
- 605 32. Davies SP, Reddy H, Caivano M, Cohen P. Specificity and mechanism of action of some commonly  
606 used protein kinase inhibitors. *Biochem J.* 2000;351: 95–105. doi:10.1517/13543776.11.3.405
- 607 33. Ahn M, Yoder SM, Wang Z, Oh E, Ramalingam L, Tunduguru R, et al. The p21-activated kinase  
608 (PAK1) is involved in diet-induced beta cell mass expansion and survival in mice and human islets.  
609 *Diabetologia.* 2016;59: 2145–2155. doi:10.1007/s00125-016-4042-0
- 610 34. Joseph GA, Hung M, Goel AJ, Hong M, Rieder M-K, Beckmann ND, et al. Late-onset megaconial  
611 myopathy in mice lacking group I Paks. *Skelet Muscle.* 2019;9: 5. doi:10.1186/s13395-019-0191-4
- 612 35. Lansey MN, Walker NN, Hargett SR, Stevens JR, Keller SR. Deletion of Rab GAP AS160 modifies  
613 glucose uptake and GLUT4 translocation in primary skeletal muscles and adipocytes and impairs  
614 glucose homeostasis. *Am J Physiol Metab.* 2012;303: E1273–E1286.  
615 doi:10.1152/ajpendo.00316.2012
- 616 36. Wang HY, Ducommun S, Quan C, Xie B, Li M, Wasserman DH, et al. AS160 deficiency causes  
617 whole-body insulin resistance via composite effects in multiple tissues. *Biochem J.* 2013;449: 479–  
618 489. doi:10.1042/BJ20120702
- 619 37. Somwar R, Niu W, Kim DY, Sweeney G, Randhawa VK, Huang C, et al. Differential Effects of  
620 Phosphatidylinositol 3-Kinase Inhibition on Intracellular Signals Regulating GLUT4 Translocation  
621 and Glucose Transport. *J Biol Chem.* 2001;276: 46079–46087. doi:10.1074/jbc.M109093200
- 622 38. Somwar R, Kim DY, Sweeney G, Huang C, Niu W, Lador C, et al. GLUT4 translocation precedes the  
623 stimulation of glucose uptake by insulin in muscle cells: potential activation of GLUT4 via p38  
624 mitogen-activated protein kinase. *Biochem J.* 2001;359: 639–49. doi:10.1042/0264-6021:3590639
- 625 39. Funaki M, Randhawa P, Janmey PA. Separation of Insulin Signaling into Distinct GLUT4  
626 Translocation and Activation Steps. *Mol Cell Biol.* 2004;24: 7567–7577.  
627 doi:10.1128/mcb.24.17.7567-7577.2004
- 628 40. Lund S, Holman GD, Zierath JR, Rincon J, Nolte LA, Clark AE, et al. Effect of Insulin on GLUT4  
629 CeU Surface Content and Turnover Rate in Human Skeletal Muscle as Measured by the Exofacial  
630 Bis-Mannose Photolabeling Technique. 1965.
- 631 41. Nozaki S, Ueda S, Takenaka N, Kataoka T, Satoh T. Role of RalA downstream of Rac1 in insulin-  
632 dependent glucose uptake in muscle cells. *Cell Signal.* 2012;24: 2111–2117.  
633 doi:10.1016/j.cellsig.2012.07.013
- 634 42. Takenaka N, Sumi Y, Matsuda K, Fujita J, Hosooka T, Noguchi T, et al. Role for RalA downstream  
635 of Rac1 in skeletal muscle insulin signalling. *Biochem J.* 2015;469: 445–54.  
636 doi:10.1042/BJ20150218
- 637 43. Bedard K, Krause K-H. The NOX Family of ROS-Generating NADPH Oxidases: Physiology and  
638 Pathophysiology. *Physiol Rev.* 2007;87: 245–313. doi:10.1152/physrev.00044.2005
- 639 44. Abo A, Pick E, Hall A, Totty N, Teahan CG, Segal AW. Activation of the NADPH oxidase involves  
640 the small GTP-binding protein p21rac1. *Nature.* 1991;353: 668–670. doi:10.1038/353668a0
- 641 45. Contreras-Ferrat A, Llanos P, Vásquez C, Espinosa A, Osorio-Fuentealba C, Arias-Calderon M, et al.  
642 Insulin elicits a ROS-activated and an IP3-dependent Ca<sup>2+</sup> release, which both impinge on GLUT4  
643 translocation. *J Cell Sci.* 2014;127: 1911–1923. doi:10.1242/jcs.138982
- 644 46. Henríquez-Olguin C, Knudsen JR, Raun SH, Li Z, Dalbram E, Treebak JT, et al. Cytosolic ROS  
645 production by NADPH oxidase 2 regulates muscle glucose uptake during exercise. *Nat Commun.*  
646 2019;10: 4623. doi:10.1038/s41467-019-12523-9

- 647 47. Sylow L, Jensen TE, Kleinert M, Mouatt JR, Maarbjerg SJ, Jeppesen J, et al. Rac1 Is a Novel  
648 Regulator of Contraction-Stimulated Glucose Uptake in Skeletal Muscle. *Diabetes*. 2013;62: 1139–  
649 1151. doi:10.2337/db12-0491
- 650 48. Allen JD, Jaffer ZM, Park SJ, Burgin S, Hofmann C, Sells MA, et al. P21-activated kinase regulates  
651 mast cell degranulation via effects on calcium mobilization and cytoskeletal dynamics. *Blood*.  
652 2009;113: 2695–2705. doi:10.1182/blood-2008-06-160861
- 653 49. Viollet B, Andreelli F, Jørgensen SB, Perrin C, Geloën A, Flamez D, et al. The AMP-activated  
654 protein kinase  $\alpha 2$  catalytic subunit controls whole-body insulin sensitivity. *J Clin Invest*. 2003;111:  
655 91–98. doi:10.1172/JCI16567
- 656 50. Kjøbsted R, Treebak JT, Fentz J, Lantier L, Viollet B, Birk JB, et al. Prior AICAR stimulation  
657 increases insulin sensitivity in mouse skeletal muscle in an AMPK-dependent manner. *Diabetes*.  
658 2015;64: 2042–2055. doi:10.2337/db14-1402
- 659 51. Strömblad G, Björntorp P. Reduced hepatic insulin clearance in rats with dietary-induced obesity.  
660 *Metabolism*. 1986;35: 323–327. doi:10.1016/0026-0495(86)90148-4
- 661 52. Brandimarti P, Costa-Júnior JM, Ferreira SM, Protzek AO, Santos GJ, Carneiro EM, et al. Cafeteria  
662 diet inhibits insulin clearance by reduced insulin-degrading enzyme expression and mRNA splicing. *J*  
663 *Endocrinol*. 2013;219: 173–182. doi:10.1530/JOE-13-0177
- 664 53. Jung S-H, Jung C-H, Reaven GM, Kim SH. Adapting to insulin resistance in obesity: role of insulin  
665 secretion and clearance. *Diabetologia*. 2018;61: 681–687. doi:10.1007/s00125-017-4511-0
- 666 54. Ferre P, Leturque A, Burnol A-F, Penicaud L, Girard J. A method to quantify glucose utilization in  
667 vivo in skeletal muscle and white adipose tissue of the anaesthetized rat. *Biochem J*. 1985;228: 103–  
668 110.
- 669 55. Fueger PT, Bracy DP, Malabanan CM, Pencek RR, Wasserman DH. Distributed control of glucose  
670 uptake by working muscles of conscious mice: roles of transport and phosphorylation. *Am J Physiol*  
671 *Metab*. 2004;286: E77–E84. doi:10.1152/ajpendo.00309.2003
- 672 56. Welinder C, Ekblad L. Coomassie Staining as Loading Control in Western Blot Analysis. *J Proteome*  
673 *Res*. 2011;10: 1416–1419. doi:10.1021/pr1011476
- 674

## Figure Legends

### **Figure 1: Insulin-stimulated glucose uptake is reduced in IPA-3-treated mouse soleus muscle.**

**(A-B)** Insulin-stimulated (60 nM) 2-Deoxyglucose (2DG) uptake in isolated soleus (A) and extensor digitorum longus (EDL, B) muscle  $\pm$  40  $\mu$ M IPA-3 or as a control DMSO (0.25%). Isolated muscles were pre-incubated for 25 minutes followed by 30 minutes of insulin stimulation with 2DG uptake analyzed for the final 10 minutes of stimulation. **(C-H)** Quantification of phosphorylated (p)PAK1 T423, pAkt T308, and pAkt S473 in insulin-stimulated soleus (C, E, and G) and EDL (D, F, and H) muscle  $\pm$  40  $\mu$ M IPA-3 or as a control DMSO (0.25%). Some of the data points were excluded due to the quality of the immunoblot, and the number of determinations was  $n = 8/7$  for pAkt S473 and T308 in soleus muscle. **(I-J)** Representative blots showing pPAK1 T423, pAkt T308, and pAkt S473 in soleus (I) and EDL (J) muscle. Statistics were evaluated with a two-way repeated measures (RM) ANOVA. Main effects are indicated in the panels. Interactions in two-way RM ANOVA were evaluated by Tukey's post hoc test: Insulin stimulation vs. basal \*\*/\*\* (p<0.01/0.001); IPA-3 vs. DMSO (#)/##/###/#### (p<0.1/0.05/0.01/0.001). Unless otherwise stated previously in the figure legend, the number of determinations in each group: Soleus,  $n = 9/8$  (DMSO/IPA-3); EDL,  $n = 9/8$ . Data are presented as mean  $\pm$  S.E.M. with individual data points shown. Paired data points are connected with a straight line. A.U., arbitrary units.

### **Figure 2: PAK1 knockout does not affect whole-body glucose homeostasis or insulin-stimulated glucose uptake in isolated skeletal muscle.**

**(A)** Representative blots showing PAK1 protein expression in gastrocnemius, quadriceps, and triceps brachii muscle from PAK1 knockout (KO) mice or control littermates. **(B)** Body composition (FM: Fat mass; LBM: Lean body mass; BW: Body weight) in gram in chow-fed PAK1 KO mice ( $n = 12$ ) or control littermates ( $n = 13$ ). The mice were 7-19 weeks of age. Statistics were evaluated with a Student's t-test. **(C)** Energy intake in chow-fed PAK1 KO mice ( $n = 8$ ) or control littermates ( $n = 8$ ). Energy intake was

monitored in a separate cohort of mice. Statistics were evaluated with a Student's t-test. **(D)** Blood glucose levels during a glucose tolerance test (GTT) in chow-fed PAK1 KO mice ( $n = 9$ ) or control littermates ( $n = 10$ ). The mice were 8-20 weeks of age. Statistics were evaluated with a two-way repeated measures (RM) ANOVA. **(E)** Incremental Area Under the Curve (AUC) for blood glucose levels during the GTT in panel D. Statistics were evaluated with a Student's t-test. **(F)** Plasma insulin values during a GTT in chow-fed PAK1 KO mice ( $n = 10$ ) or control littermates ( $n = 13$ ). The mice were 9-21 weeks of age. Statistics were evaluated with a two-way RM measures ANOVA. **(G)** Homeostatic Model Assessment of Insulin Resistance (HOMA-IR) in chow-fed PAK1 KO mice ( $n=10$ ) or control littermates ( $n=13$ ). Statistics were evaluated with a Student's t-test. **(H-I)** Submaximal (0.6 nM) and maximal (60 nM) insulin-stimulated 2-Deoxyglucose (2DG) uptake in isolated soleus (H) and extensor digitorum longus (EDL; I) muscle from PAK1 KO mice or littermate controls. Isolated muscles were pre-incubated for 30 minutes followed by 30 minutes of insulin stimulation with 2DG uptake analyzed for the final 10 minutes of stimulation. The mice were 12-24 weeks of age. The number of determinations in each group: Soleus-Control,  $n = 6/7$  (Submax/max); Soleus-PAK1 KO,  $n = 7/7$ ; EDL-Control,  $n = 6/6$ ; EDL-PAK1 KO,  $n = 7/7$ . Statistics were evaluated with two two-way RM measures ANOVA. Main effects are indicated in the panels. Data are presented as mean  $\pm$  S.E.M. or when applicable mean  $\pm$  S.E.M. with individual data points shown. Paired data points are connected with a straight line.

**Figure 3: PAK1 is dispensable for *in vivo* insulin-stimulated glucose uptake in mouse skeletal muscle.** **(A-B)** Blood glucose levels during a retro-orbital insulin tolerance test (r.o. ITT) in chow- (A) and HFD-fed (B) PAK1 knockout (KO) mice or control littermates. Chow-fed mice were investigated at 10-24 weeks of age. Mice fed a 60E% high-fat diet (HFD) for 21 weeks were investigated at 27-37 weeks of age. The number of mice in each group: Chow,  $n = 12/6$  (Control/PAK1 KO); HFD,  $n = 10/11$ . Statistics were evaluated with a two-way repeated measures

ANOVA. **(C-D)** Insulin-stimulated (Chow: 0.5 U kg<sup>-1</sup> body weight; HFD: 60% of insulin administered to chow-fed mice) glucose uptake index in gastrocnemius (Gast), quadriceps (Quad), triceps brachii (Triceps) and soleus muscle from chow- (C) and HFD-fed (D) PAK1 KO mice or control littermates. The number of mice in each group: Chow-Saline,  $n = 12/4$  (Control/PAK1 KO); Chow-Insulin,  $n = 12/6$ ; HFD-Saline,  $n = 6/6$ ; HFD-Insulin,  $n = 10/11$ . Statistics were evaluated with a two-way ANOVA for each of the muscles. Main effects are indicated in the panels. Data are presented as mean  $\pm$  S.E.M. or when applicable mean  $\pm$  S.E.M. with individual data points shown.

**Figure 4: Whole-body energy utilization is unaffected by whole-body genetic ablation of PAK1 and muscle-specific genetic ablation of PAK2.** **(A)** Representative blots showing PAK1 and PAK2 protein expression in soleus and extensor digitorum longus (EDL) muscle from chow-fed whole-body PAK1 knockout (KO), muscle-specific PAK2 (m)KO, PAK1/2 double KO (d1/2KO) mice or control littermates. **(B)** Body weight of chow-fed PAK1 KO ( $n = 18$ ), PAK2 mKO ( $n = 21$ ), 1/m2 dKO mice ( $n = 23$ ) or control littermates ( $n = 20$ ). The mice were 16-29 weeks of age. Statistics were evaluated with a two-way ANOVA to test the factors 'PAK1' (PAK1<sup>+/-</sup> vs. PAK<sup>-/-</sup>) and 'PAK2' (PAK2<sup>fl/fl</sup>;MyoD<sup>+/+</sup> vs. PAK2<sup>fl/fl</sup>;MyoD<sup>iCre/+</sup>) thereby assessing the relative contribution of PAK1 and PAK2, respectively. Differences between genotypes were evaluated with one-way ANOVA. **(C)** Body composition (FM: Fat mass; LBM: Lean body mass) in gram in chow-fed PAK1 KO ( $n = 18$ ), PAK2 mKO ( $n = 21$ ), 1/m2 dKO mice ( $n = 23$ ) or control littermates ( $n = 20$ ). Statistics were evaluated with a two-way ANOVA to test the factors 'PAK1' (PAK1<sup>+/-</sup> vs. PAK<sup>-/-</sup>) and 'PAK2' (PAK2<sup>fl/fl</sup>;MyoD<sup>+/+</sup> vs. PAK2<sup>fl/fl</sup>;MyoD<sup>iCre/+</sup>) thereby assessing the relative contribution of PAK1 and PAK2, respectively. Differences between genotypes were evaluated with a one-way ANOVA. **(D-G)** Oxygen uptake (VO<sub>2</sub>; D), respiratory exchange ratio (RER; E), activity (beam breaks; F), and energy intake (G), in chow-fed PAK1 KO ( $n = 11$ ), PAK2 mKO ( $n = 11$ ), 1/m2 dKO mice ( $n = 13$ ) or control littermates ( $n = 8$ ; for energy intake,  $n = 7$ )

during the light and dark period recorded over a period of 72 hours. On day 2, the mice were fasted during the dark period and then refed on day 3. The mice were 23-33 weeks of age. Statistics were evaluated with two two-way ANOVAs to test the factors ‘PAK1’ (PAK1<sup>+/-</sup> vs. PAK<sup>-/-</sup>) and ‘PAK2’ (PAK2<sup>fl/fl</sup>;MyoD<sup>+/+</sup> vs. PAK2<sup>fl/fl</sup>;MyoD<sup>iCre/+</sup>) in the light and dark period of day 1, respectively. Statistics for day 2 and 3 were evaluated similarly thereby assessing the relative contribution of PAK1 and PAK2. Differences between genotypes and the effect of the light and dark period were assessed with three two-way repeated measures (RM) ANOVA to test the factors ‘Genotype’ (Control vs. PAK1 KO vs. PAK2 mKO vs. 1/m2 dKO) and ‘Period’ (Light vs. Dark) at day 1, 2 and 3, respectively. Main effects are indicated in the panels. Significant one-way ANOVA and interactions in two-way (RM when applicable) ANOVA were evaluated by Tukey’s post hoc test: Light vs. dark period *\*/\*\*/\*\** ( $p < 0.05/0.01/0.001$ ); Control vs. 1/m2 dKO  $\dagger/\dagger\dagger$  ( $p < 0.05/0.001$ ); PAK1 KO vs. 1/m2 dKO  $\ddagger/\ddagger\dagger/\ddagger\dagger\dagger$  ( $p < 0.05/0.01/0.001$ ); PAK2 mKO vs. 1/m2 dKO ( $\$/\$/\$/$ ) ( $p < 0.1/0.05/0.01$ ). Data are presented as mean  $\pm$  S.E.M. or when applicable mean  $\pm$  S.E.M. with individual data points shown.

**Figure 5: Mice lacking PAK2 in skeletal muscle are slightly glucose intolerant. (A)** Blood glucose concentration in the fed state (8 a.m.) in chow-fed whole-body PAK1 knockout (KO) ( $n = 18$ ), muscle-specific PAK2 (m)KO ( $n = 21$ ), PAK1/2 double KO (d1/2KO) mice ( $n = 23$ ) or control littermates ( $n = 20$ ). The mice were 17-30 weeks of age. Statistics were evaluated with a two-way ANOVA to test the factors ‘PAK1’ (PAK1<sup>+/-</sup> vs. PAK<sup>-/-</sup>) and ‘PAK2’ (PAK2<sup>fl/fl</sup>;MyoD<sup>+/+</sup> vs. PAK2<sup>fl/fl</sup>;MyoD<sup>iCre/+</sup>) thereby assessing the relative contribution of PAK1 and PAK2, respectively. Differences between genotypes were evaluated with a one-way ANOVA. **(B)** Blood glucose levels during a glucose tolerance test (GTT) in chow-fed PAK1 KO ( $n = 18$ ), PAK2 mKO ( $n = 19$ ), 1/m2 dKO mice ( $n = 21$ ) or control littermates ( $n = 19$ ). The mice were 13-26 weeks of age. Statistics were evaluated with six two-way ANOVAs to test the factors ‘PAK1’ (PAK1<sup>+/-</sup> vs. PAK<sup>-/-</sup>) and

‘PAK2’ (PAK2<sup>fl/fl</sup>;MyoD<sup>+/+</sup> vs. PAK2<sup>fl/fl</sup>;MyoD<sup>iCre/+</sup>) at time point 0, 15, 30, 60, 90 and 120, respectively, thereby assessing the relative contribution of PAK1 and PAK2. Differences between genotypes and the effect of glucose administration were assessed with a two-way repeated measures (RM) ANOVA to test the factors ‘Genotype’ (Control vs. PAK1 KO vs. PAK2 mKO vs. 1/m2 dKO) and ‘Time’ (0 vs. 15 vs. 30 vs. 60 vs. 90 vs. 120). (C) Incremental Area Under the Curve (AUC) for blood glucose levels during the GTT in panel B. Statistics were evaluated with a two-way ANOVA to test the factors ‘PAK1’ (PAK1<sup>+/-</sup> vs. PAK<sup>-/-</sup>) and ‘PAK2’ (PAK2<sup>fl/fl</sup>;MyoD<sup>+/+</sup> vs. PAK2<sup>fl/fl</sup>;MyoD<sup>iCre/+</sup>) thereby assessing the relative contribution of PAK1 and PAK2, respectively. Differences between genotypes were evaluated with one-way ANOVA. (D) Plasma insulin values during a GTT in chow-fed PAK1 KO ( $n = 17$ ), PAK2 mKO ( $n = 19$ ), 1/m2 dKO mice ( $n = 22$ ) or control littermates ( $n = 19$ ). The mice were 15-28 weeks of age. Statistics were evaluated with two two-way ANOVAs to test the factors ‘PAK1’ (PAK1<sup>+/-</sup> vs. PAK<sup>-/-</sup>) and ‘PAK2’ (PAK2<sup>fl/fl</sup>;MyoD<sup>+/+</sup> vs. PAK2<sup>fl/fl</sup>;MyoD<sup>iCre/+</sup>) at time point 0 and 20, respectively, thereby assessing the relative contribution of PAK1 and PAK2. Differences between genotypes and the effect of glucose administration were assessed with a two-way RM ANOVA to test the factors ‘Genotype’ (Control vs. PAK1 KO vs. PAK2 mKO vs. 1/m2 dKO) and ‘Time’ (0 vs. 20). (E) Homeostatic Model Assessment of Insulin Resistance (HOMA-IR) in chow-fed PAK1 KO ( $n = 18$ ), PAK2 mKO ( $n = 19$ ), 1/m2 dKO mice ( $n = 22$ ) or control littermates ( $n = 20$ ). Statistics were evaluated with a two-way ANOVA to test the factors ‘PAK1’ (PAK1<sup>+/-</sup> vs. PAK<sup>-/-</sup>) and ‘PAK2’ (PAK2<sup>fl/fl</sup>;MyoD<sup>+/+</sup> vs. PAK2<sup>fl/fl</sup>;MyoD<sup>iCre/+</sup>) thereby assessing the relative contribution of PAK1 and PAK2, respectively. Differences between genotypes were evaluated with a one-way ANOVA. (F) Blood glucose levels related to the basal concentration during an insulin tolerance test (ITT) in chow-fed PAK1 KO ( $n = 15$ ), PAK2 mKO ( $n = 18$ ), 1/m2 dKO mice ( $n = 21$ ) or control littermates ( $n = 19$ ). The mice were 11-24 weeks of age. For two female control mice and four female PAK2 mKO mice,

the ITT had to be stopped before the 120'-time point due to hypoglycemia (blood glucose <1.2 mM), and thus blood glucose was not determined for these mice for the last couple of time points. Statistics were evaluated with five two-way ANOVAs to test the factors 'PAK1' (PAK1<sup>+/-</sup> vs. PAK1<sup>-/-</sup>) and 'PAK2' (PAK2<sup>fl/fl</sup>;MyoD<sup>+/+</sup> vs. PAK2<sup>fl/fl</sup>;MyoD<sup>iCre/+</sup>) at time point 15, 30, 60, 90 and 120, respectively, thereby assessing the relative contribution of PAK1 and PAK2. Differences between genotypes and the effect of insulin administration were assessed with a mixed-effects model analysis to test the factors 'Genotype' (Control vs. PAK1 KO vs. PAK2 mKO vs. 1/m2 dKO) and 'Time' (0 vs. 15 vs. 30 vs. 60 vs. 90 vs. 120). Main effects are indicated in the panels. Significant one-way ANOVA and interactions in two-way (RM when applicable) ANOVA were evaluated by Tukey's post hoc test: Effect of glucose/insulin administration vs. time point 0' \*/\*\*\* (p<0.05/0.001). Data are presented as mean ± S.E.M. or when applicable mean ± S.E.M. with individual data points shown. Paired data points are connected with a straight line.

**Figure 6: Muscle-specific PAK2 knockout, but not knockout of PAK1, partly reduces glucose uptake in EDL muscle. (A-B)** Insulin-stimulated (60 nM) 2-Deoxyglucose (2DG) uptake in isolated soleus (A) and extensor digitorum longus (EDL; B) muscle from whole-body PAK1 knockout (KO), muscle-specific PAK2 (m)KO, PAK1/2 double KO (d1/2KO) mice or control littermates. Isolated muscles were pre-incubated for 20 minutes followed by 20 minutes of insulin stimulation with 2DG uptake analyzed for the final 10 minutes of stimulation. The mice were 10-16 weeks of age. Statistics were evaluated with two two-way ANOVAs to test the factors 'PAK1' (PAK1<sup>+/-</sup> vs. PAK1<sup>-/-</sup>) and 'PAK2' (PAK2<sup>fl/fl</sup>;MyoD<sup>+/+</sup> vs. PAK2<sup>fl/fl</sup>;MyoD<sup>iCre/+</sup>) in basal and insulin-stimulated samples, respectively, thereby assessing the relative contribution of PAK1 and PAK2. Differences between genotypes and the effect of insulin stimulation were assessed with a two-way repeated measures (RM) ANOVA to test the factors 'Genotype' (Control vs. PAK1 KO vs. PAK2 mKO vs. 1/m2 dKO) and 'Stimuli' (Basal vs. Insulin). (C-D) Δ2DG uptake in soleus (C)



and EDL (D) muscle from panel C-D. Statistics were evaluated with a two-way ANOVA to test the factors ‘PAK1’ (PAK1<sup>+/-</sup> vs. PAK1<sup>-/-</sup>) and ‘PAK2’ (PAK2<sup>fl/fl</sup>;MyoD<sup>+/+</sup> vs. PAK2<sup>fl/fl</sup>;MyoD<sup>iCre/+</sup>) to assess of the relative contribution of PAK1 and PAK2, respectively. Differences between genotypes were evaluated with a one-way ANOVA. The number of determinations in each group: Control,  $n = 9/10$  (soleus/EDL); PAK1 KO,  $n = 8/9$ ; PAK2 KO,  $n = 10/10$ ; PAK1/2 dKO,  $n = 9/9$ . Main effects are indicated in the panels. Significant one-way ANOVA and interactions in two-way (RM when applicable) ANOVA were evaluated by Tukey’s post hoc test: Insulin-stimulation vs. basal control \*\*\* ( $p < 0.001$ ); Control vs. PAK2 mKO £ ( $p < 0.05$ ); PAK1 KO vs. PAK2 mKO § ( $p < 0.05$ ). Data are presented as mean  $\pm$  S.E.M. with individual data points shown. Paired data points are connected with a straight line.

**Figure 7: Lack of PAK2 affects TBC1D4 protein expression and signalling. (A-J)**

Quantification of phosphorylated (p)Akt S473, pAkt T308, pTBC1D4 T642 and total TBC1D4 and GLUT4 protein expression in insulin-stimulated (60 nM) soleus (A, C, E, G, and I) and extensor digitorum longus (EDL; B, D, F, H, and J) muscle from whole-body PAK1 knockout (KO), muscle-specific PAK2 (m)KO, PAK1/2 double KO (d1/2KO) mice or control littermates. The mice were 10-16 weeks of age. Total protein expression is an average of the paired basal and insulin-stimulated sample. Some of the data points were excluded due to the quality of the immunoblot, so the number of determinations for GLUT4 in soleus muscle: Control,  $n = 6$ ; PAK1 KO,  $n = 5$ ; PAK2 KO,  $n = 6$ ; PAK1/2 dKO,  $n = 6$ . (K-L) Representative blots showing pAkt S473, pAkt T308, pTBC1D4 T642 and total PAK1, PAK2, Akt2, TBC1D4 and GLUT4 protein expression and coomassie staining as a loading control in soleus (K) and EDL (L) muscle. Statistics for phosphorylated proteins were evaluated with a two two-way ANOVAs to test the factors ‘PAK1’ (PAK1<sup>+/-</sup> vs. PAK1<sup>-/-</sup>) and ‘PAK2’ (PAK2<sup>fl/fl</sup>;MyoD<sup>+/+</sup> vs. PAK2<sup>fl/fl</sup>;MyoD<sup>iCre/+</sup>) in basal and insulin-stimulated samples, respectively, thereby assessing the relative contribution of PAK1 and

PAK2. Differences between genotypes and the effect of insulin stimulation were assessed with a two-way repeated measures (RM) ANOVA to test the factors ‘Genotype’ (Control vs. PAK1 KO vs. PAK2 mKO vs. 1/m2 dKO) and ‘Stimuli’ (Basal vs. Insulin). Statistics for total protein expression were evaluated with a two-way ANOVA to test the factors ‘PAK1’ (PAK1<sup>+/-</sup> vs. PAK<sup>-/-</sup>) and ‘PAK2’ (PAK2<sup>fl/fl</sup>;MyoD<sup>+/+</sup> vs. PAK2<sup>fl/fl</sup>;MyoD<sup>iCre/+</sup>) thereby assessing the relative contribution of PAK1 and PAK2, respectively. Differences between genotypes were evaluated with a one-way ANOVA. Main effects are indicated in the panels. Significant one-way ANOVA and interactions in two-way (RM when applicable) ANOVA were evaluated by Tukey’s post hoc test: Control vs. PAK2 mKO £ (p<0.05). Unless otherwise stated previously in the figure legend, the number of determinations in each group: Control, *n* = 9/10 (soleus/EDL); PAK1 KO, *n* = 8/9; PAK2 KO, *n* = 10/9; PAK1/2 dKO, *n* = 9/9. Data are presented as mean ± S.E.M. with individual data points shown. Paired data points are connected with a straight line. A.U., arbitrary units.

### **Supplementary figures**

**Figure S1: (A-B)** Insulin-stimulated (Chow: 0.5 U kg<sup>-1</sup> body weight; HFD: 60% of insulin administered to chow-fed mice) 2-Deoxyglucose (2DG) clearance in gastrocnemius (Gast), quadriceps (Quad), triceps brachii (Triceps) and soleus muscle from chow- (A) and 60E% high-fat diet (HFD)-fed (B) PAK1 knockout (KO) mice or control littermates. The number of mice in each group: Chow-Saline, *n* = 12/4 (Control/PAK1 KO); Chow-Insulin, *n* = 12/6; HFD-Saline, *n* = 6/6; HFD-Insulin, *n* = 10/11. Statistics were evaluated with a two-way ANOVA for each of the muscles. **(C)** Plasma [<sup>3</sup>H] counts 10 minutes after retro-orbital (r.o.) administration of a bolus of saline containing [<sup>3</sup>H]-labelled 2DG ([<sup>3</sup>H]-2DG) with or without insulin. Statistics were evaluated with two two-way ANOVAs to test the factors ‘stimuli’ (basal vs. insulin) and ‘genotype’ (control vs.

PAK1 KO) in chow-fed and HFD-fed mice, respectively. **(D)** Body composition (FM: Fat mass; LBM: Lean body mass; BW: Body weight) in gram in HFD-fed PAK1 KO mice ( $n = 17$ ) or control littermates ( $n = 14$ ). Body composition was assessed in week 18-19 of the diet intervention. The mice were 24-34 weeks of age. Statistics were evaluated with a Student's t-test. **(E)** Energy intake in HFD-fed PAK1 KO mice ( $n = 8$ ) or control littermates ( $n = 8$ ). Energy intake was monitored in a separate cohort of mice. Statistics were evaluated with a Student's t-test. **(F)** Blood glucose levels during a glucose tolerance test (GTT) in HFD-fed PAK1 KO mice ( $n = 17$ ) or control littermates ( $n = 13$ ). Glucose tolerance was assessed in week 14 of the diet intervention. The mice were 20-30 weeks of age. Statistics were evaluated with a two-way repeated measures (RM) ANOVA. **(G)** Incremental Area Under the Curve (AUC) for blood glucose levels during the GTT in panel F. Statistics were evaluated with a Student's t-test. **(H)** Plasma insulin values during a GTT in HFD-fed PAK1 KO mice ( $n = 16$ ) or control littermates ( $n = 11$ ). The plasma insulin response to glucose administration was measured in week 16 of the diet intervention. The mice were 22-32 weeks of age. Statistics were evaluated with a two-way RM ANOVA. **(I)** Homeostatic Model Assessment of Insulin Resistance (HOMA-IR) in HFD-fed PAK1 KO mice ( $n = 16$ ) or control littermates ( $n = 11$ ). Statistics were evaluated with a Student's t-test. Main effects are indicated in the panels. Data are presented as mean  $\pm$  S.E.M. or when applicable mean  $\pm$  S.E.M. with individual data points shown. Paired data points are connected with a straight line.

**Figure S2:** **(A-B)** Body weight of female (A) and male (B) whole-body PAK1 knockout (KO), muscle-specific PAK2 (m)KO, PAK1/2 double KO (d1/2KO) mice or control littermates. **(C-D)** Body composition (FM: Fat mass; LBM: Lean body mass) in gram in female (C) and male (D) PAK1 KO, PAK2 mKO, 1/m2 dKO or control littermates. **(E-G)** Body composition (FM: Fat mass; LBM: Lean body mass) in percentage in both sexes combined (E) and in female (F) and male (G) PAK1 KO, PAK2 mKO, 1/m2 dKO or control littermates. The number of mice in each group:

Control,  $n = 9/11$  (female/male); PAK1 KO,  $n = 8/10$ ; PAK2 mKO,  $n = 12/9$ ; 1/m2 dKO,  $n = 9/14$ . Statistics were evaluated with a two-way ANOVA to test the factors ‘PAK1’ (PAK1<sup>+/-</sup> vs. PAK1<sup>-/-</sup>) and ‘PAK2’ (PAK2<sup>fl/fl</sup>;MyoD<sup>+/+</sup> vs. PAK2<sup>fl/fl</sup>;MyoD<sup>iCre/+</sup>) thereby assessing the relative contribution of PAK1 and PAK2, respectively. Differences between genotypes were evaluated with a one-way ANOVA. Main effects are indicated in the panels. Significant one-way ANOVA and interactions in two-way ANOVA were evaluated by Tukey’s post hoc test: Control vs. 1/m2 dKO †/†† ( $p < 0.05/0.01$ ); PAK1 KO vs. PAK2 mKO § ( $p < 0.05$ ); PAK1 KO vs. 1/m2 dKO ‡/‡‡/‡‡‡ ( $p < 0.05/0.01/0.001$ ); PAK2 mKO vs. 1/m2 dKO (\$) /\$\$ ( $p < 0.1/0.01$ ). Data are presented as mean  $\pm$  S.E.M. with individual data points shown.

**Figure S3:** (A-F) Oxygen uptake ( $VO_2$ ), respiratory exchange ratio (RER), and activity (beam breaks) in female (A,C, and E) and male (B,D, and F) whole-body PAK1 knockout (KO), muscle-specific PAK2 (m)KO, PAK1/2 double KO (d1/2KO) mice or control littermates during the light and dark period recorded over a period of 72 hours in calorimetric chambers. On day 2, mice fasted during the dark period and then refed on day 3. (G-I) Total energy intake on day 1 and day 3 in both sexes combined (G) and in female (H) and male (I) whole-body PAK1 KO, PAK2 mKO, 1/m2 dKO mice or control littermates recorded over a period of 72 hours in calorimetric chambers. (J-K) Energy intake in female (J) and male (K) whole-body PAK1 KO, Pak2 mKO, 1/m2 dKO mice or control littermates during the light and dark period recorded over a period of 72 hours in calorimetric chambers. On day 2, mice fasted during the dark period and were then refed on day 3. The number of mice in each group: Control,  $n = 5/3$  (female/male; for energy intake,  $n = 4/3$ ); PAK1 KO,  $n = 6/5$ ; PAK2 mKO,  $n = 6/5$ ; 1/m2 dKO,  $n = 6/7$ . (A-F+J-K) Statistics were evaluated with two two-way ANOVAs to test the factors ‘PAK1’ (PAK1<sup>+/-</sup> vs. PAK1<sup>-/-</sup>) and ‘PAK2’ (PAK2<sup>fl/fl</sup>;MyoD<sup>+/+</sup> vs. PAK2<sup>fl/fl</sup>;MyoD<sup>iCre/+</sup>) in the light and dark period of day 1, respectively. Statistics for day 2 and 3 were evaluated similarly thereby assessing the relative contribution of

PAK1 and PAK2. Differences between genotypes and the effect of the light and the dark period were assessed with three two-way repeated measures (RM) ANOVA to test the factors ‘Genotype’ (Control vs. PAK1 KO vs. PAK2 mKO vs. 1/m2 dKO) and ‘Period’ (Light vs. Dark) at day 1, 2 and 3, respectively. **(G-I)** Statistics were evaluated with two two-way ANOVAs to test the factors ‘PAK1’ (PAK1<sup>+/-</sup> vs. PAK<sup>-/-</sup>) and ‘PAK2’ (PAK2<sup>fl/fl</sup>;MyoD<sup>+/+</sup> vs. PAK2<sup>fl/fl</sup>;MyoD<sup>iCre/+</sup>) at day 1 and day 2, respectively. Differences between genotypes and the day were assessed with one two-way repeated measures (RM) ANOVA to test the factors ‘Genotype’ (Control vs. PAK1 KO vs. PAK2 mKO vs. 1/m2 dKO) and ‘Day’ (Day 1 vs. Day 3). Main effects are indicated in the panels. Significant one-way ANOVA and interactions in two-way (RM when applicable) ANOVA were evaluated by Tukey’s post hoc test: Light vs. dark period \*/\*\*/\*\* (p<0.05/0.01/0.001); Day 1 vs. Day 3 €€/€€€ (p<0.01/0.001); Control vs. PAK1 KO ♂ (p<0.01); Control vs. 1/m2 dKO † (p<0.05); PAK1 KO vs. PAK2 mKO §/§§ (p<0.05/0.01); PAK1 KO vs. 1/m2 dKO ‡/‡‡/‡‡‡ (p<0.05/0.01/0.001). Data are presented as mean ± S.E.M. with individual data points shown.

**Figure S4: (A-B)** Blood glucose concentration in the fed state (8 a.m.) in female (A) and male (B) whole-body PAK1 knockout (KO), muscle-specific PAK2 (m)KO, PAK1/2 double KO (d1/2KO) mice or control littermates. The number of mice in each group: Control, *n* = 9/11 (female/male); PAK1 KO, *n* = 8/10; PAK2 mKO, *n* = 12/9; 1/m2 dKO, *n* = 9/14. Statistics were evaluated with a two-way ANOVA to test the factors ‘PAK1’ (PAK1<sup>+/-</sup> vs. PAK<sup>-/-</sup>) and ‘PAK2’ (PAK2<sup>fl/fl</sup>;MyoD<sup>+/+</sup> vs. PAK2<sup>fl/fl</sup>;MyoD<sup>iCre/+</sup>) thereby assessing the relative contribution of PAK1 and PAK2, respectively. Differences between genotypes were evaluated with a one-way ANOVA. **(C-D)** Blood glucose levels during a glucose tolerance test (GTT) in female (C) and male (D) PAK1 KO, PAK2 mKO, 1/m2 dKO mice or control littermates. The number of mice in each group: Control, *n* = 8/11 (female/male); PAK1 KO, *n* = 8/10; PAK2 mKO, *n* = 10/9; 1/m2 dKO, *n* = 8/13. Statistics were evaluated with six two-way ANOVAs to test the factors ‘PAK1’ (PAK1<sup>+/-</sup> vs. PAK<sup>-/-</sup>) and ‘PAK2’

(PAK2<sup>fl/fl</sup>;MyoD<sup>+/+</sup> vs. PAK2<sup>fl/fl</sup>;MyoD<sup>iCre/+</sup>) at time point 0, 15, 30, 60, 90 and 120, respectively, thereby assessing the relative contribution of PAK1 and PAK2. Differences between genotypes and the effect of glucose administration were assessed with a two-way repeated measures (RM) ANOVA to test the factors ‘Genotype’ (Control vs. PAK1 KO vs. PAK2 mKO vs. 1/m2 dKO) and ‘Time’ (0 vs. 15 vs. 30 vs. 60 vs. 90 vs. 120). **(E-F)** Incremental Area Under the Curve (AUC) for blood glucose levels for females (E) and male (F) mice during the GTT in panel C-D. Statistics were evaluated with a two-way ANOVA to test the factors ‘PAK1’ (PAK1<sup>+/-</sup> vs. PAK<sup>-/-</sup>) and ‘PAK2’ (PAK2<sup>fl/fl</sup>;MyoD<sup>+/+</sup> vs. PAK2<sup>fl/fl</sup>;MyoD<sup>iCre/+</sup>) thereby assessing the relative contribution of PAK1 and PAK2, respectively. Differences between genotypes were evaluated with a one-way ANOVA. **(G-H)** Plasma insulin values during a GTT in female (G) and male (F) PAK1 KO, PAK2 mKO, 1/m2 dKO mice or control littermates. The number of mice in each group: Control,  $n = 9/10$  (female/male); PAK1 KO,  $n = 8/9$ ; PAK2 mKO,  $n = 10/9$ ; 1/m2 dKO,  $n = 9/13$ . Statistics were evaluated with two two-way ANOVAs to test the factors ‘PAK1’ (PAK1<sup>+/-</sup> vs. PAK<sup>-/-</sup>) and ‘PAK2’ (PAK2<sup>fl/fl</sup>;MyoD<sup>+/+</sup> vs. PAK2<sup>fl/fl</sup>;MyoD<sup>iCre/+</sup>) at time point 0 and 20, respectively, thereby assessing the relative contribution of PAK1 and PAK2. Differences between genotypes and the effect of glucose administration were assessed with a two-way RM ANOVA to test the factors ‘Genotype’ (Control vs. PAK1 KO vs. PAK2 mKO vs. 1/m2 dKO) and ‘Time’ (0 vs. 20). Main effects are indicated in the panels. Significant one-way ANOVA and interactions in two-way (RM when applicable) ANOVA were evaluated by Tukey’s post hoc test: Effect of glucose administration vs. time point 0’ \*/\*\*\* (p<0.05/0.001); Control vs. PAK2 mKO £ (p<0.05); PAK1 KO vs. PAK2 mKO §§ (p<0.01); PAK2 mKO vs. 1/m2 dKO \$ (p<0.05). Data are presented as mean ± S.E.M. or when applicable mean ± S.E.M. with individual data points shown. Paired data points are connected with a straight line.

**Figure S5: (A-B)** Homeostatic Model Assessment of Insulin Resistance (HOMA-IR) in female (A) and male (B) whole-body PAK1 knockout (KO), muscle-specific PAK2 (m)KO, PAK1/2 double KO (d1/2KO) mice or control littermates. The number of mice in each group: Control,  $n = 9/11$  (female/male); PAK1 KO,  $n = 8/10$ ; PAK2 mKO,  $n = 10/9$ ; 1/m2 dKO,  $n = 9/13$ . Statistics were evaluated with a two-way ANOVA to test the factors ‘PAK1’ (PAK1<sup>+/-</sup> vs. PAK<sup>-/-</sup>) and ‘PAK2’ (PAK2<sup>fl/fl</sup>;MyoD<sup>+/+</sup> vs. PAK2<sup>fl/fl</sup>;MyoD<sup>iCre/+</sup>) thereby assessing the relative contribution of PAK1 and PAK2, respectively. Genotype differences were evaluated with a one-way ANOVA. **(C-E)** Basal blood glucose concentration (fasted state) immediately before an insulin tolerance test (ITT) in both sexes combined (C) and in female (D) and male (E) PAK1 KO, PAK2 mKO, 1/m2 dKO mice and control littermates. The number of mice in each group: Control,  $n = 9/10$  (female/male); PAK1 KO,  $n = 6/9$ ; PAK2 mKO,  $n = 10/8$ ; 1/m2 dKO,  $n = 8/13$ . Statistics were evaluated with a two-way ANOVA to test the factors ‘PAK1’ (PAK1<sup>+/-</sup> vs. PAK<sup>-/-</sup>) and ‘PAK2’ (PAK2<sup>fl/fl</sup>;MyoD<sup>+/+</sup> vs. PAK2<sup>fl/fl</sup>;MyoD<sup>iCre/+</sup>) thereby assessing the relative contribution of PAK1 and PAK2, respectively. Differences between genotypes were evaluated with a one-way ANOVA. **(F-G)** Blood glucose levels related to basal concentration during an ITT in female (F) and male (G) PAK1 KO, PAK2 mKO, 1/m2 dKO mice or control littermates. The number of mice in each group: Control,  $n = 9/10$  (female/male); PAK1 KO,  $n = 6/9$ ; PAK2 mKO,  $n = 10/8$ ; 1/m2 dKO,  $n = 8/13$ . For two female control mice and four female PAK2 mKO mice, the ITT had to be stopped before the 120’-time point due to hypoglycemia (blood glucose <1.2 mM), and thus blood glucose was not determined for these mice for the last couple of time points. Statistics were evaluated with five two-way ANOVAs to test the factors ‘PAK1’ (PAK1<sup>+/-</sup> vs. PAK<sup>-/-</sup>) and ‘PAK2’ (PAK2<sup>fl/fl</sup>;MyoD<sup>+/+</sup> vs. PAK2<sup>fl/fl</sup>;MyoD<sup>iCre/+</sup>) at time point 15, 30, 60, 90 and 120, respectively, thereby assessing the relative contribution of PAK1 and PAK2. Differences between genotypes and the effect of insulin administration were assessed with a two-way repeated measures (RM) ANOVA (mixed-effects

model analysis for female mice) to test the factors ‘Genotype’ (Control vs. PAK1 KO vs. PAK2 mKO vs. 1/m2 dKO) and ‘Time’ (0 vs. 15 vs. 30 vs. 60 vs. 90 vs. 120). Main effects are indicated in the panels. Significant one-way ANOVA and interactions in two-way (RM when applicable) ANOVA were evaluated by Tukey’s post hoc test: Effect of insulin administration vs. time point 0’ \*\*/\*\*\*\* (p<0.01/0.001); Control vs. PAK1 KO  $\alpha/\alpha\alpha$  (p<0.05/0.01); Control vs. PAK2 mKO (£)££ (p<0.1/0.01); Control vs. 1/m2 dKO ††† (p<0.001); PAK1 KO vs. 1/m2 dKO ‡ (p<0.05); PAK2 mKO vs. 1/m2 dKO \$ (p<0.05). Data are presented as mean  $\pm$  S.E.M. or when applicable mean  $\pm$  S.E.M. with individual data points shown.

**Figure S6:** (A-D)  $\Delta$ -phosphorylated (p)-Akt S473 and  $\Delta$ pAkt T308 in insulin-stimulated (60 nM) soleus (A and C) and extensor digitorum longus (EDL; B and D) muscle from whole-body PAK1 knockout (KO), muscle-specific PAK2 (m)KO, PAK1/2 double KO (d1/2KO) mice or control littermates from Fig. 7A-D. (E-F) Quantification of total Akt2 protein expression in soleus (E) and EDL (F) muscle from whole-body PAK1 KO, PAK2 mKO, 1/m2 dKO mice or control littermates. Total protein expression is an average of the paired basal and insulin-stimulated sample. (G-H)  $\Delta$ pTBC1D4 T642 in insulin-stimulated (60 nM) soleus (G) and EDL (H) muscle from whole-body PAK1 KO, PAK2 mKO, 1/m2 dKO mice or control littermates from Fig. 7G-H. Statistics were evaluated with a two-way ANOVA to test the factors ‘PAK1’ (PAK1<sup>+/-</sup> vs. PAK1<sup>-/-</sup>) and ‘PAK2’ (PAK2<sup>fl/fl</sup>;MyoD<sup>+/+</sup> vs. PAK2<sup>fl/fl</sup>;MyoD<sup>iCre/+</sup>) thereby assessing the relative contribution of PAK1 and PAK2, respectively. Differences between genotypes were evaluated with a one-way ANOVA. The number of determinations in each group: Control, *n* = 9/10 (soleus/EDL); PAK1 KO, *n* = 8/9; PAK2 KO, *n* = 10/9; PAK1/2 dKO, *n* = 9/9. Significant one-way ANOVA was evaluated by Tukey’s post hoc test: Control vs. PAK2 mKO £ (p<0.05). Data are presented as mean  $\pm$  S.E.M. with individual data points shown. A.U., arbitrary units.





**Figure 1**

**A**

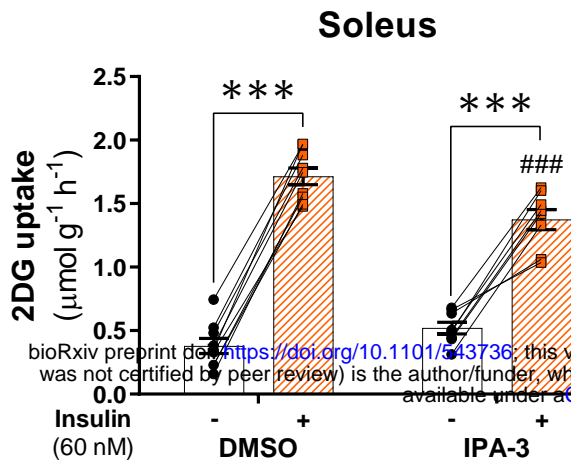

**B**

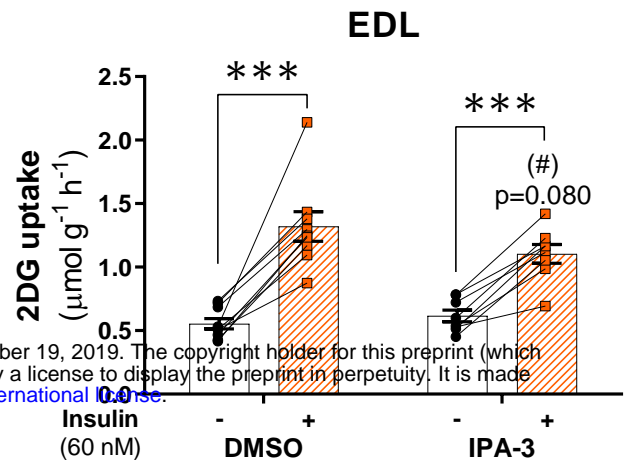

bioRxiv preprint doi: <https://doi.org/10.1101/437366>; this version posted November 19, 2019. The copyright holder for this preprint (which was not certified by peer review) is the author/funder, who has granted bioRxiv a license to display the preprint in perpetuity. It is made available under aCC-BY-NC-ND 4.0 International license.

**C**

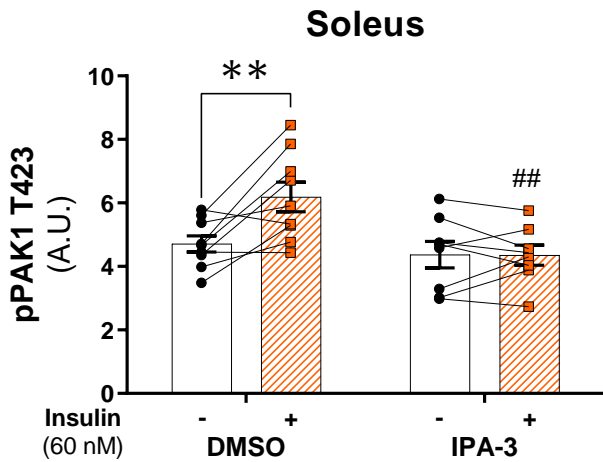

**D**

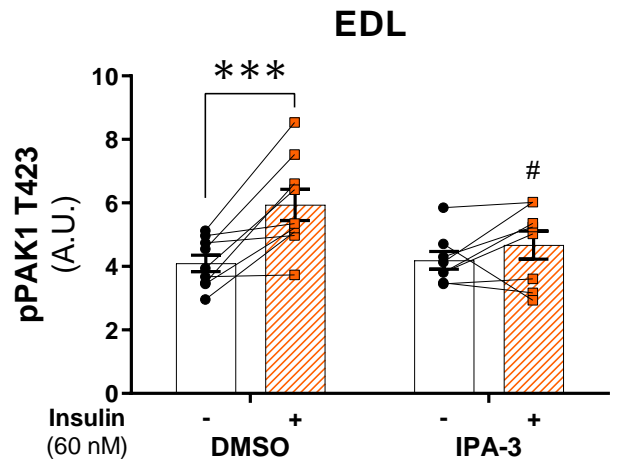

**E**

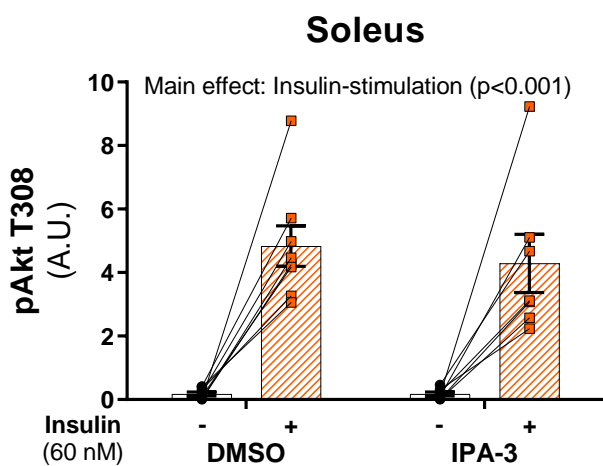

**F**

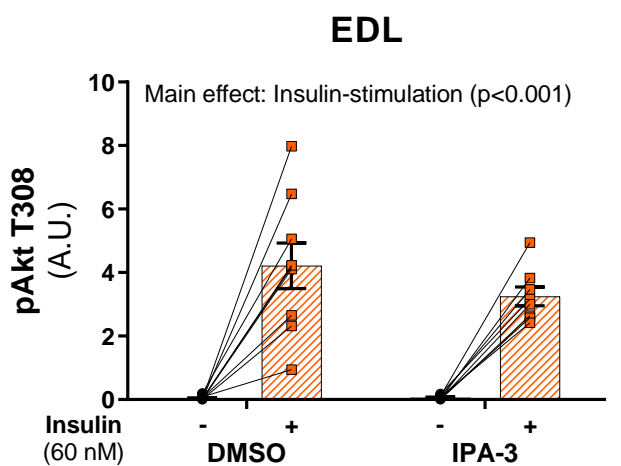

**G**

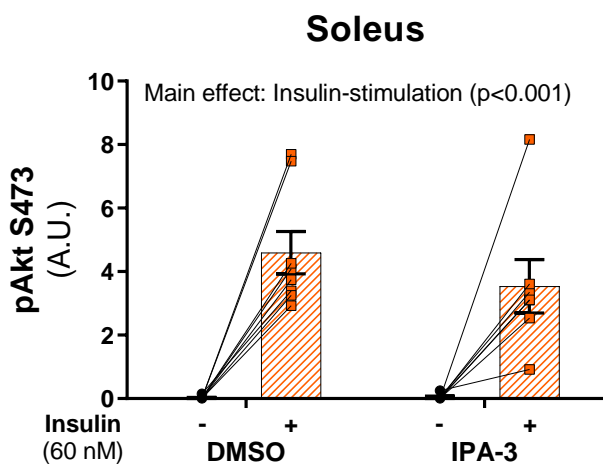

**H**

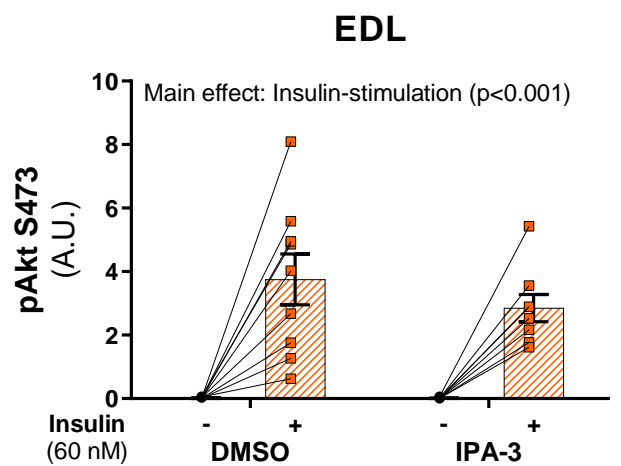

**I**

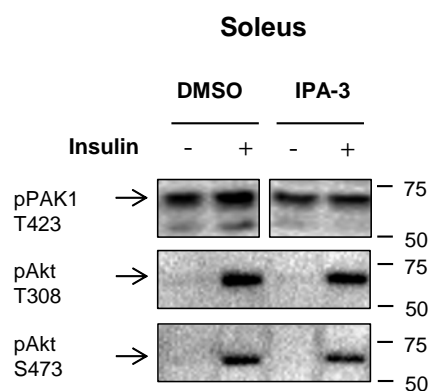

**J**

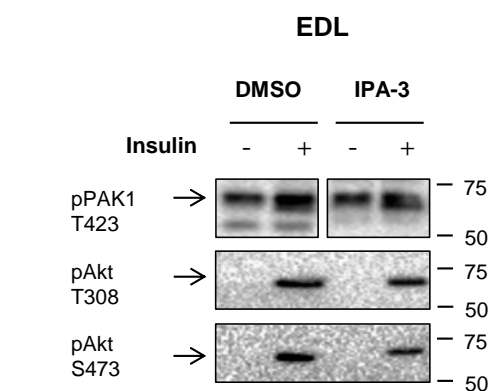

**Figure 2****A**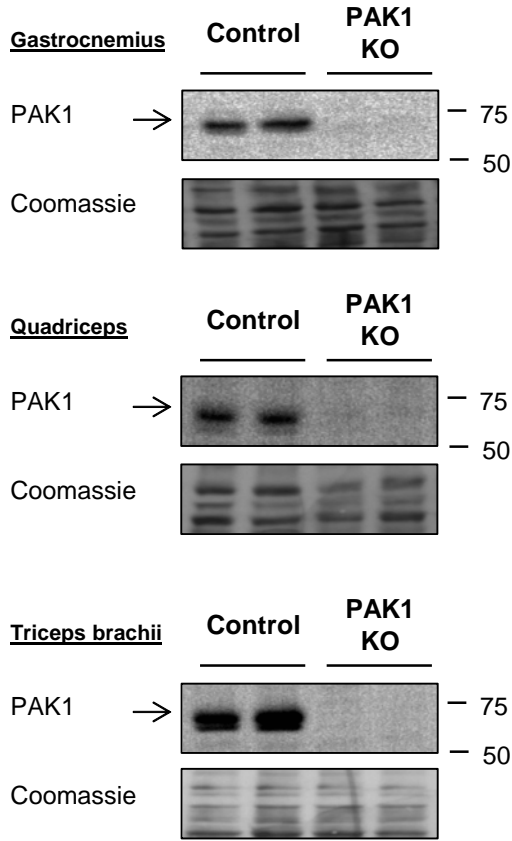**B**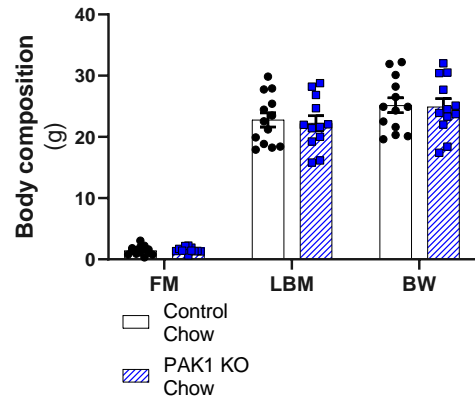**C**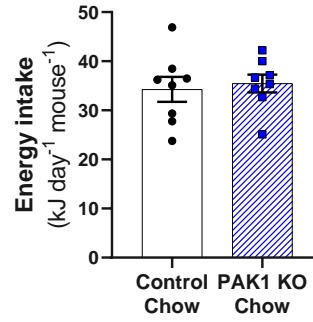**D**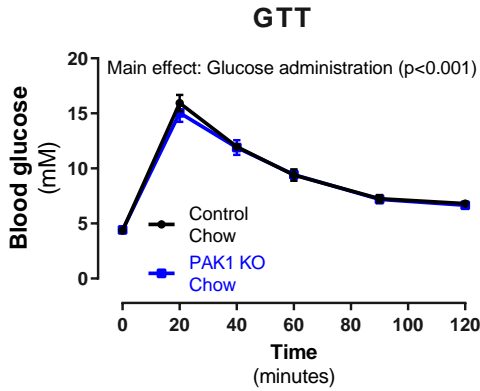**E**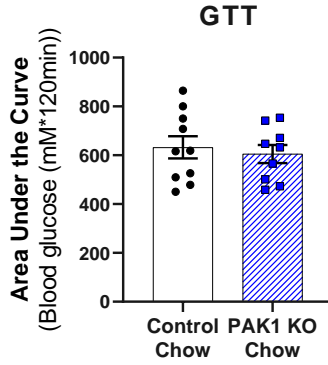**F**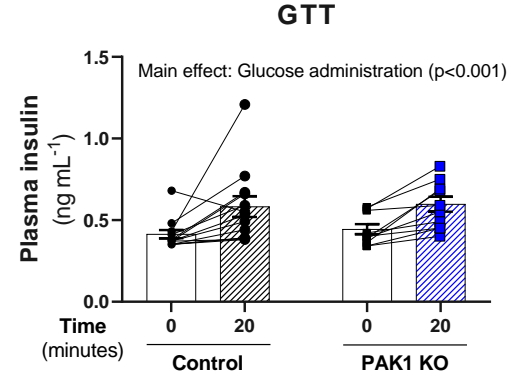**G**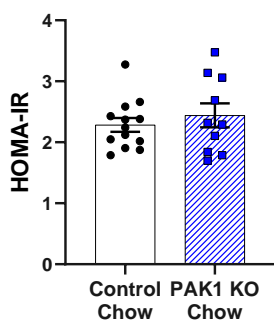**H**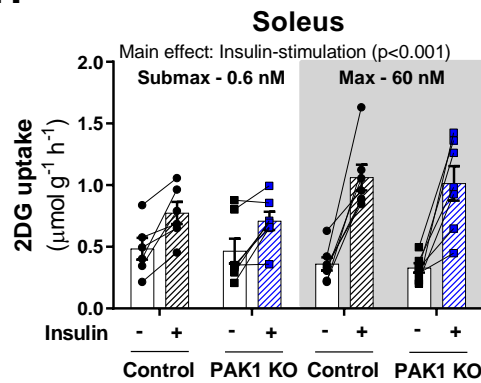**I**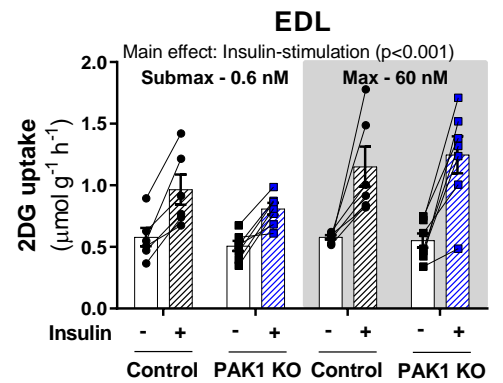

**Figure 3****A**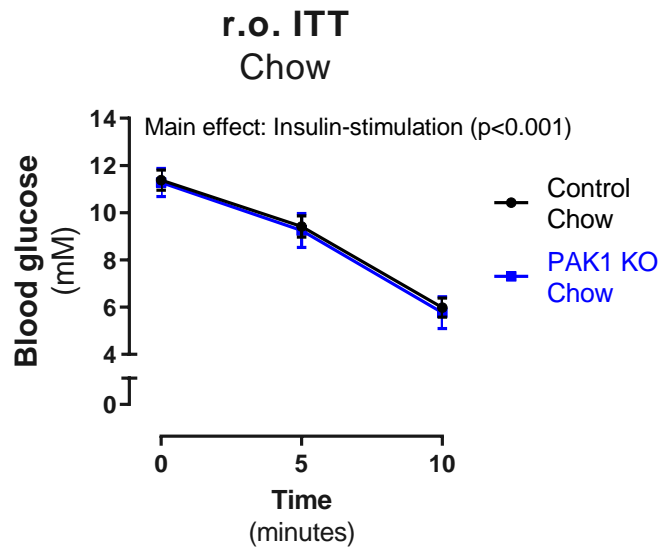**B**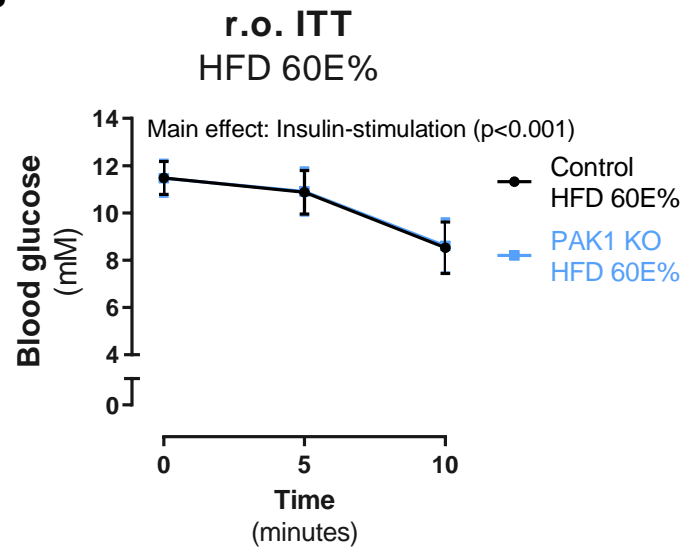**C**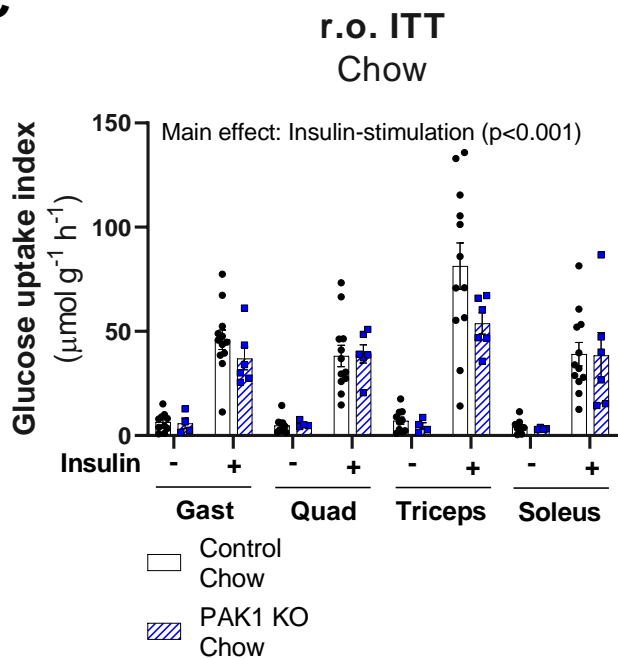**D**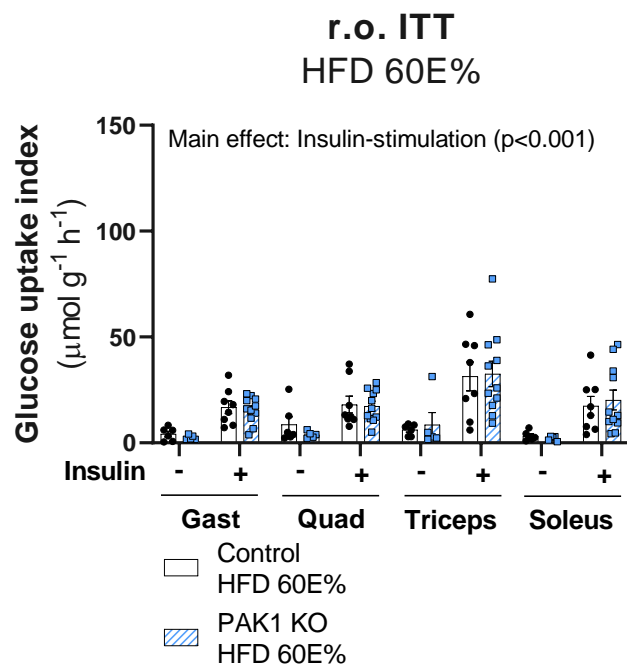

# Figure 4

**A**

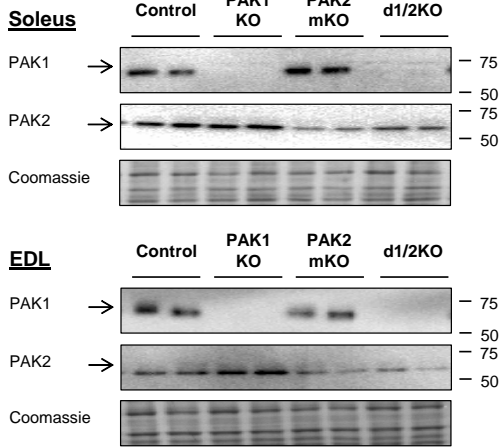

**B**

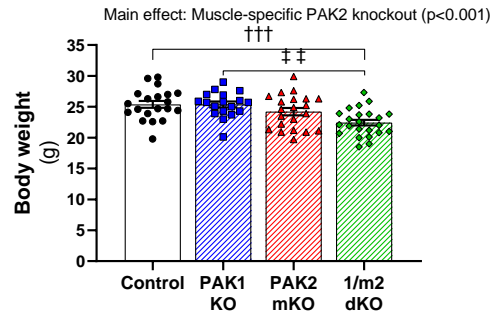

**C**

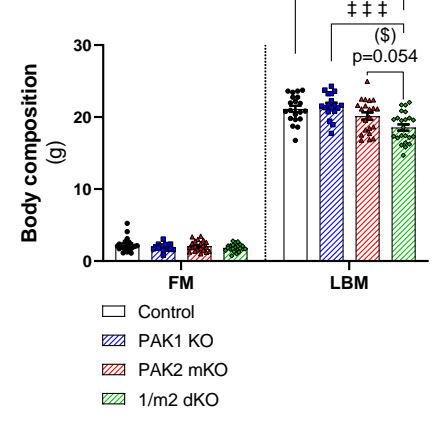

**D**

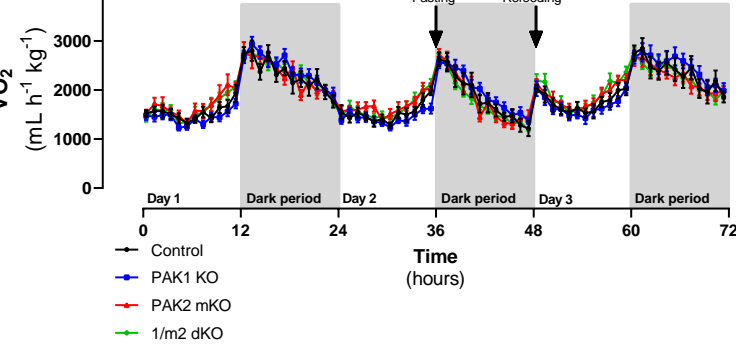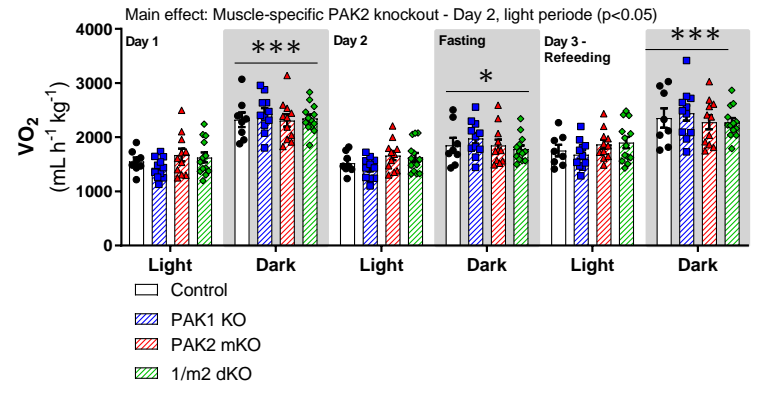

**E**

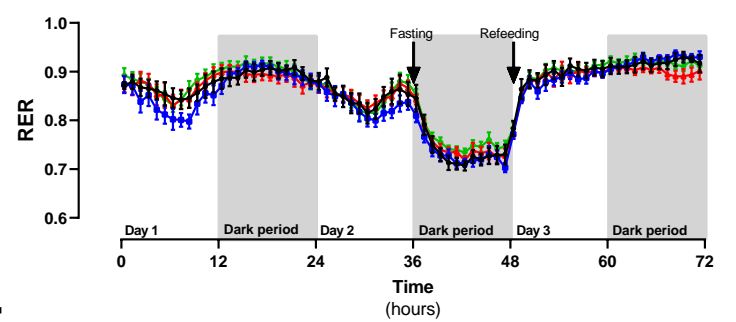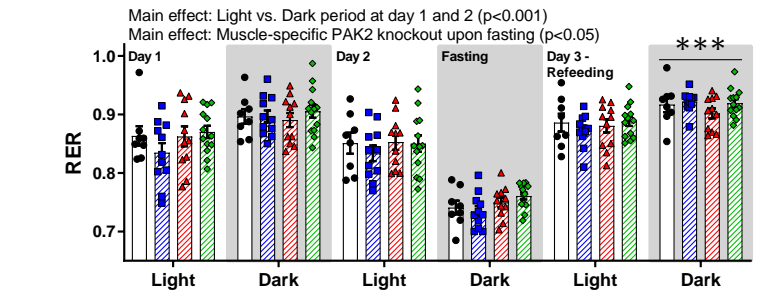

**F**

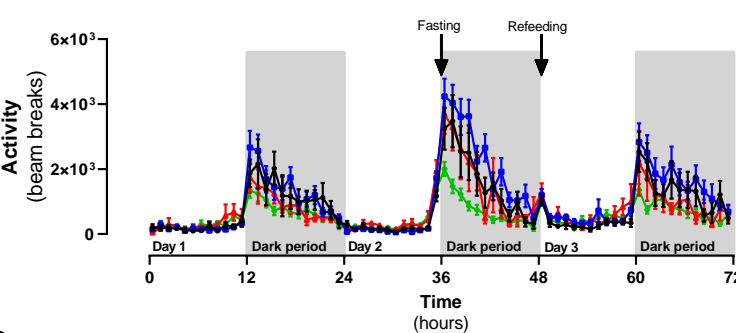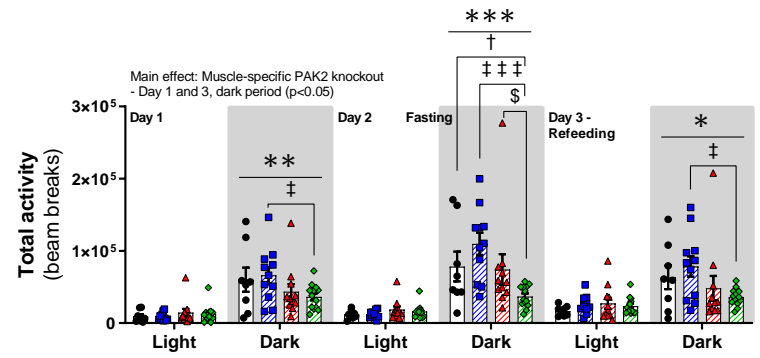

**G**

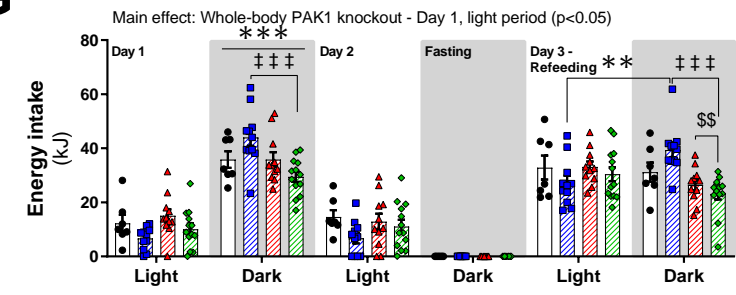

# Figure 5

## A

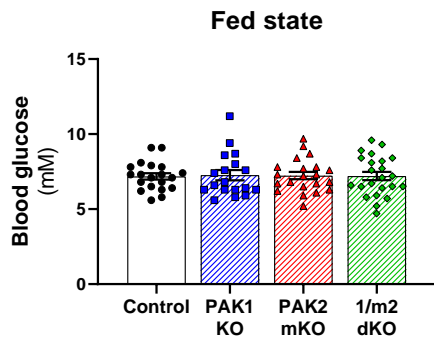

## B

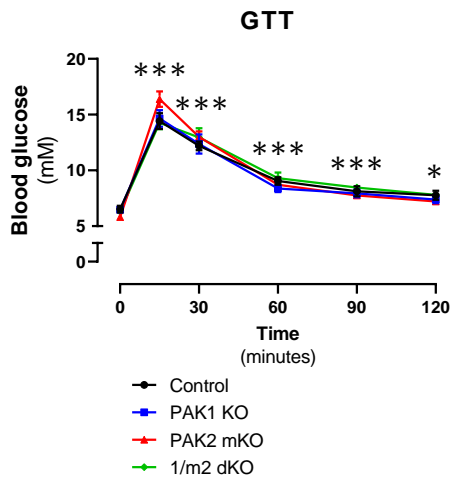

## C

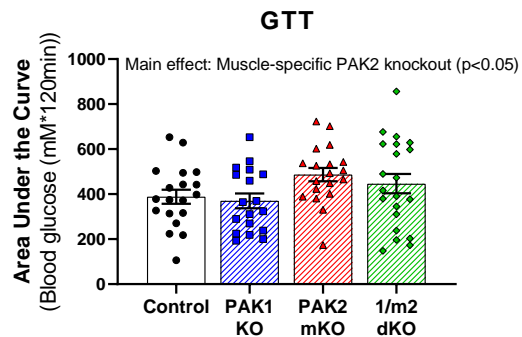

## D

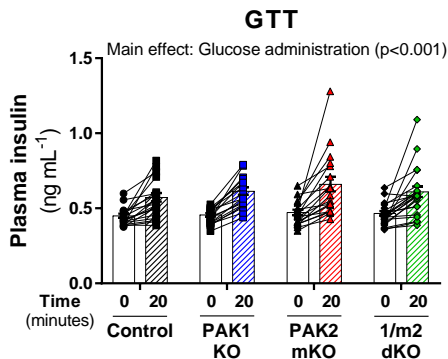

## E

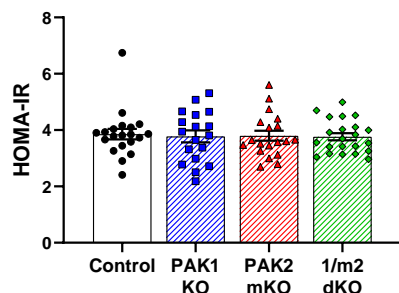

## F

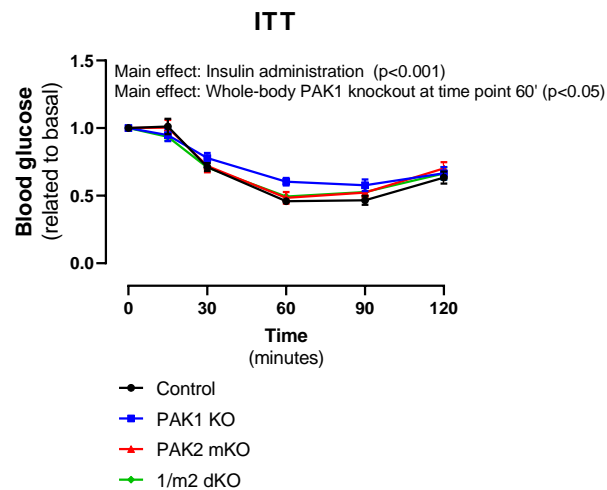

**Figure 6**

**A**

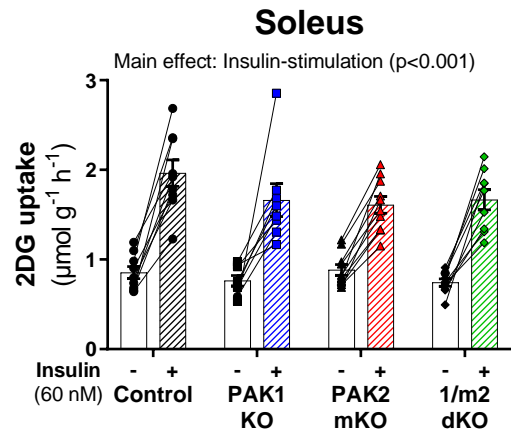

**B**

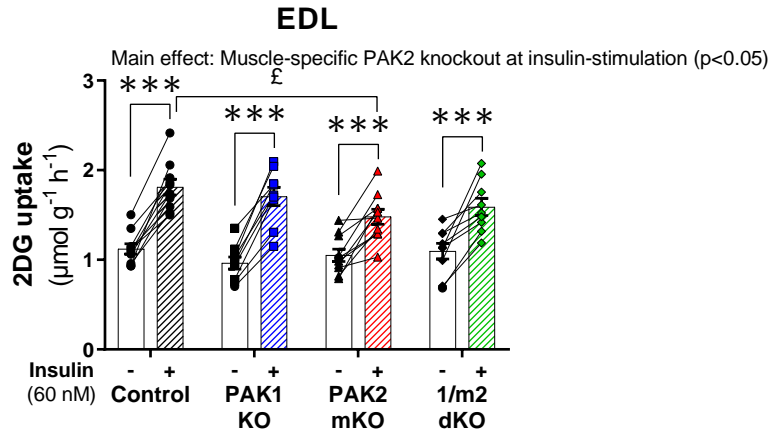

**C**

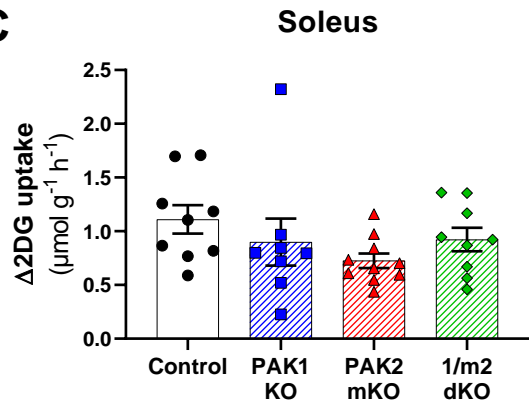

**D**

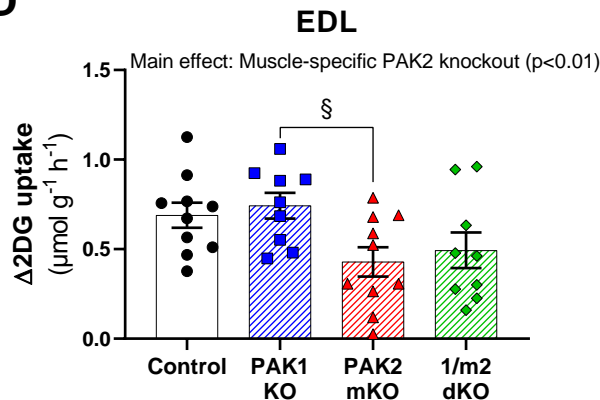

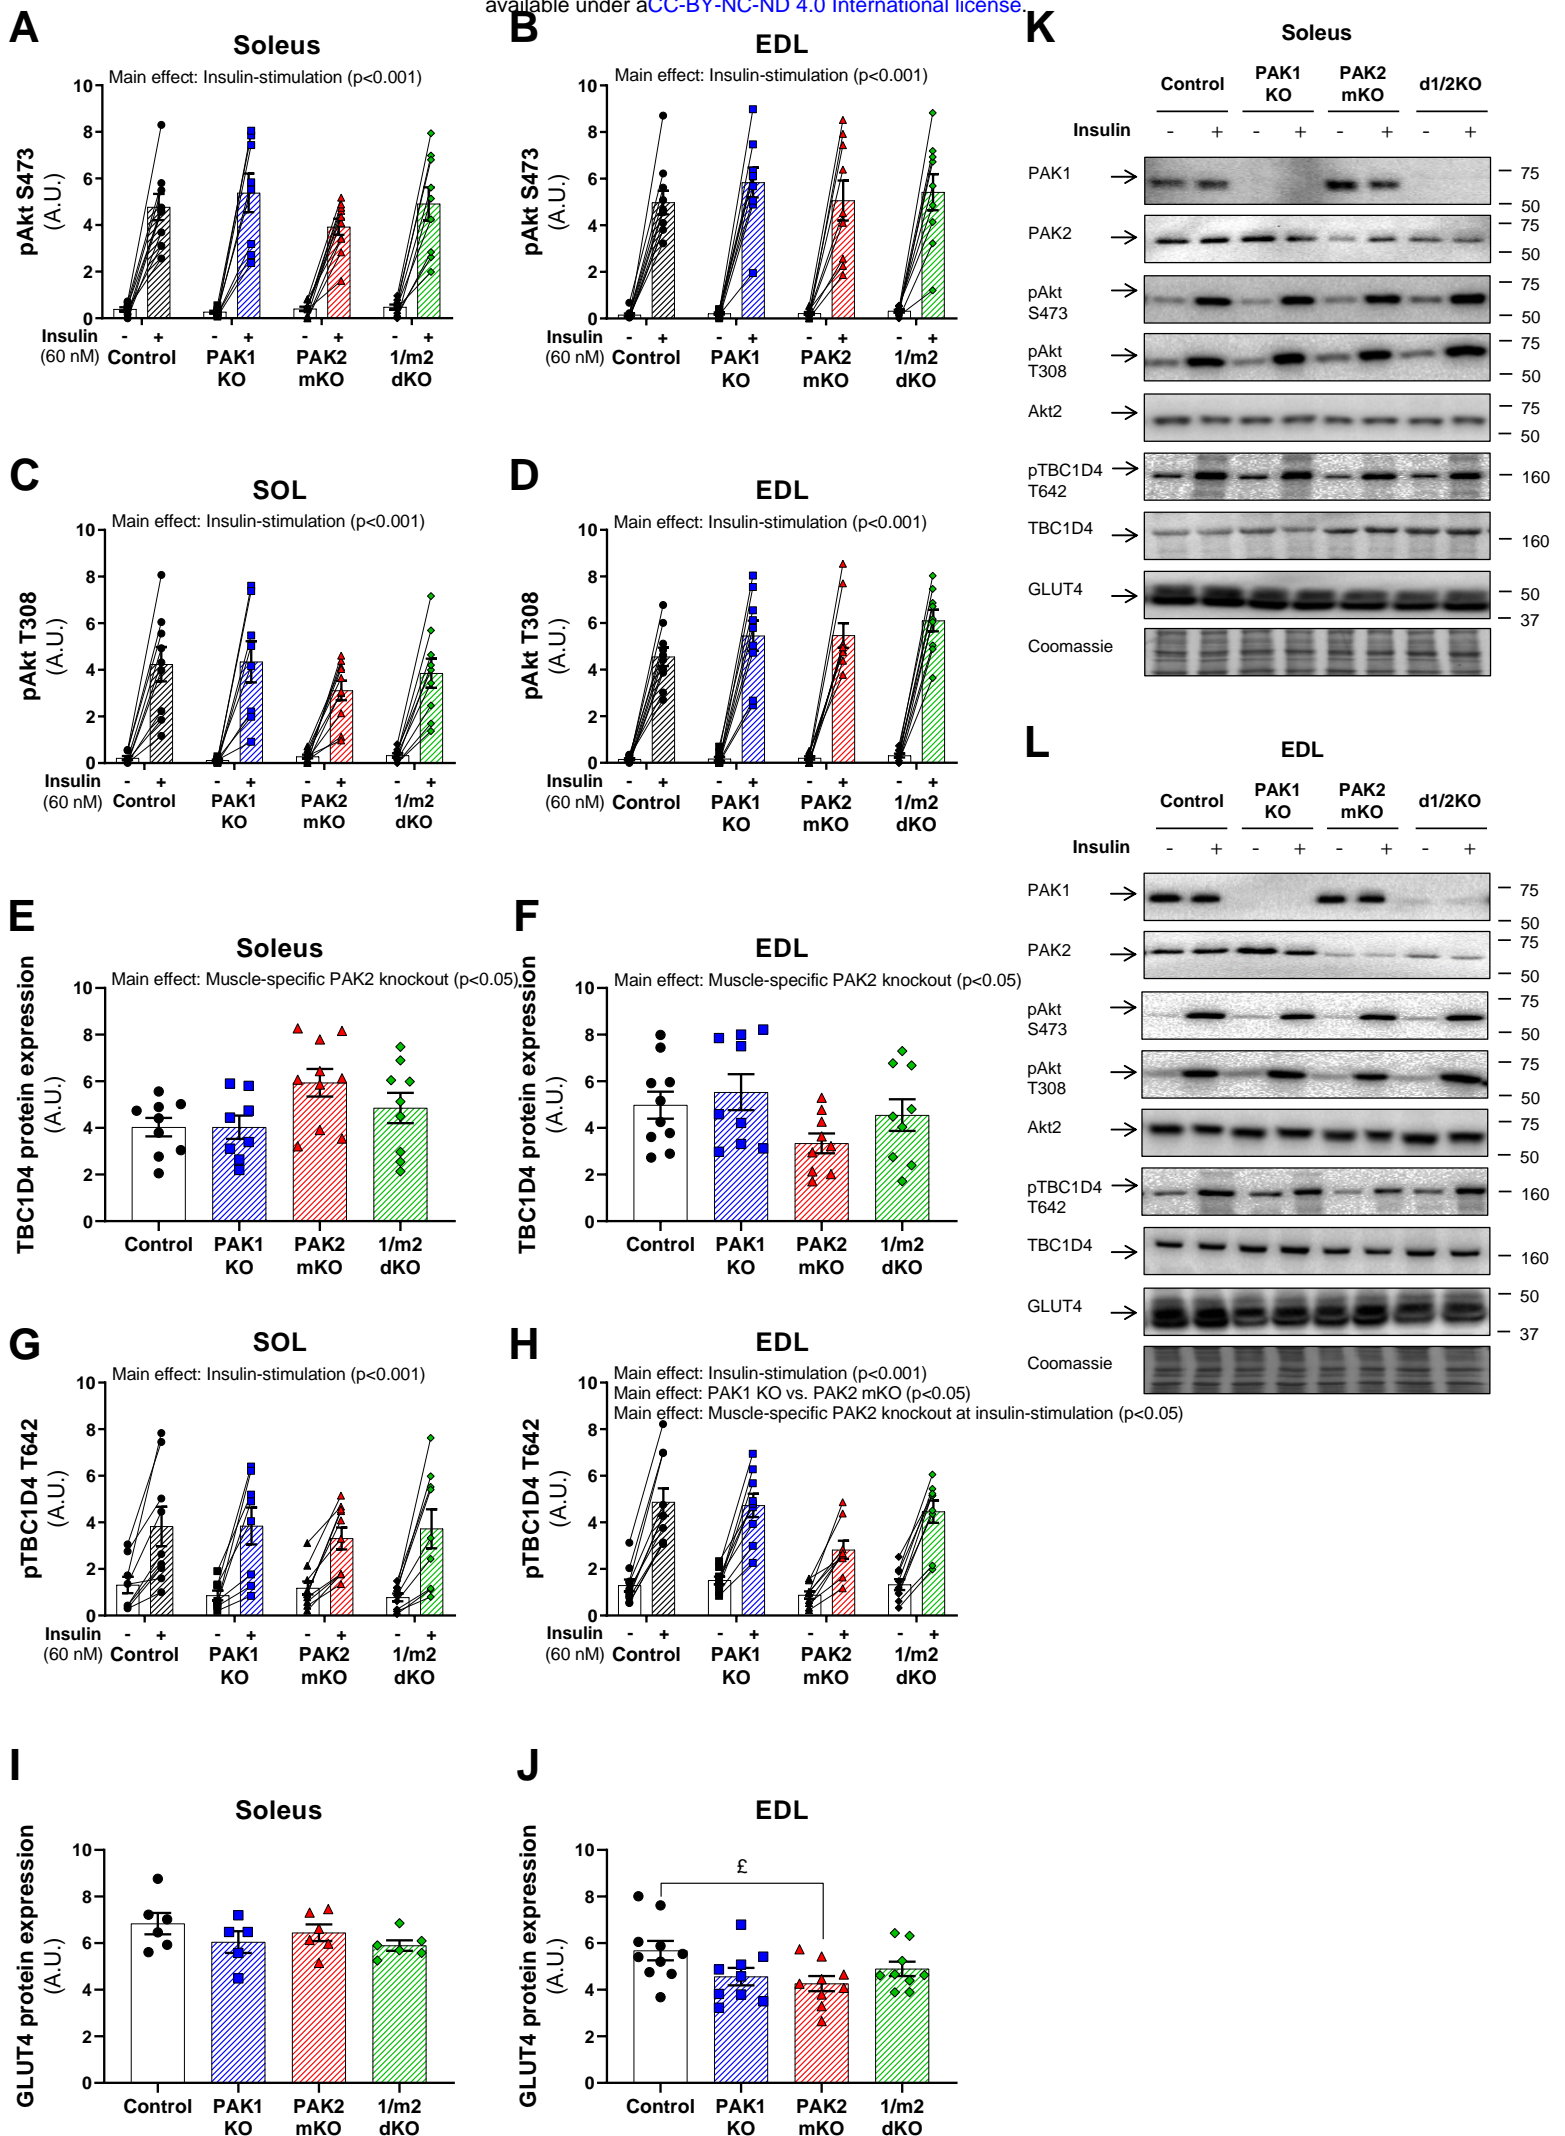



**Figure S1****A**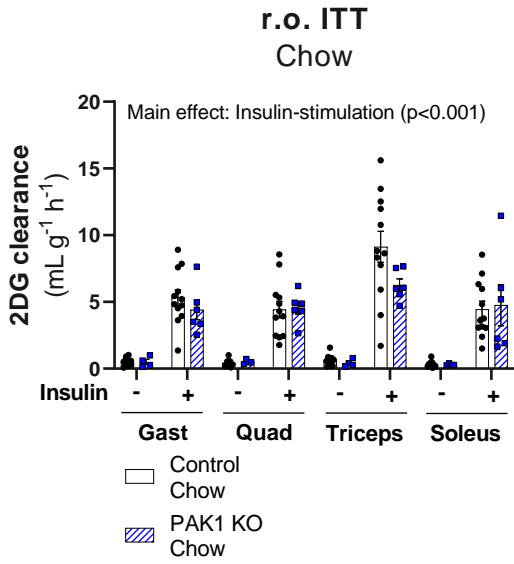**B**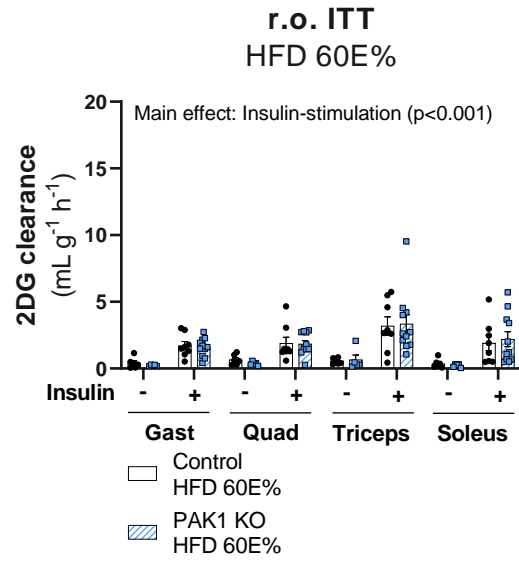**C**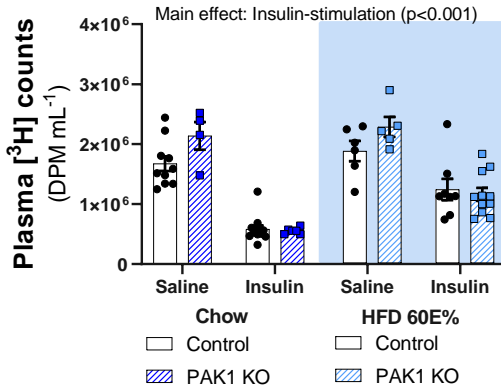**D**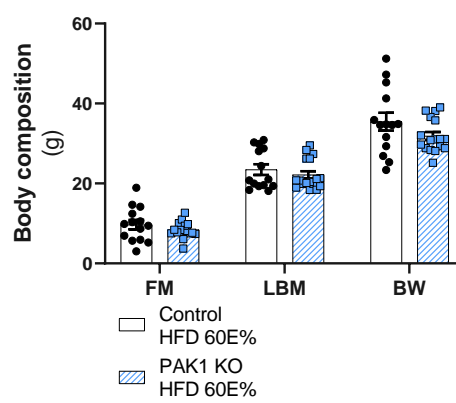**E**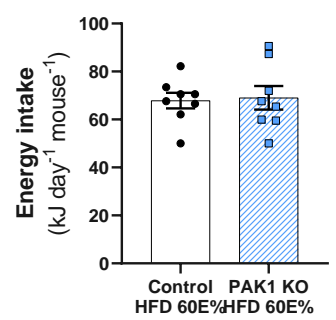**F**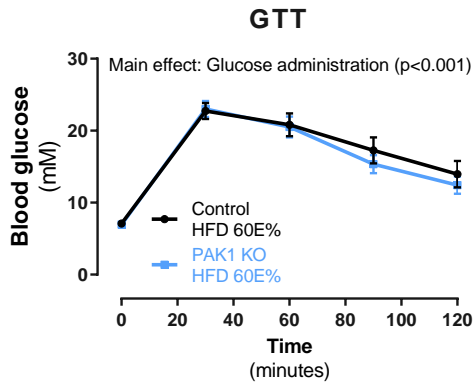**G**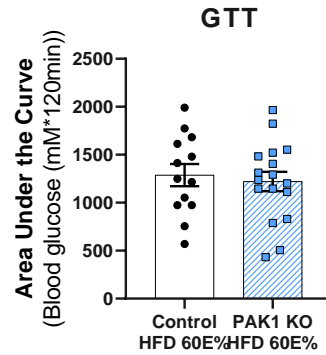**H**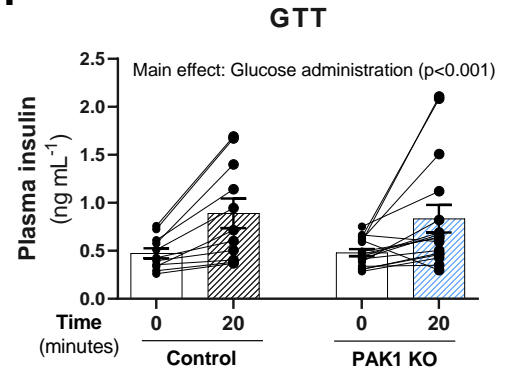**I**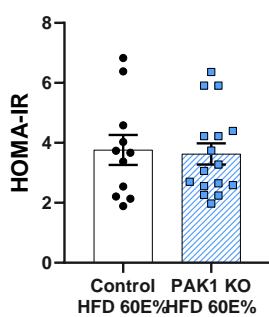

# Figure S2

**A**

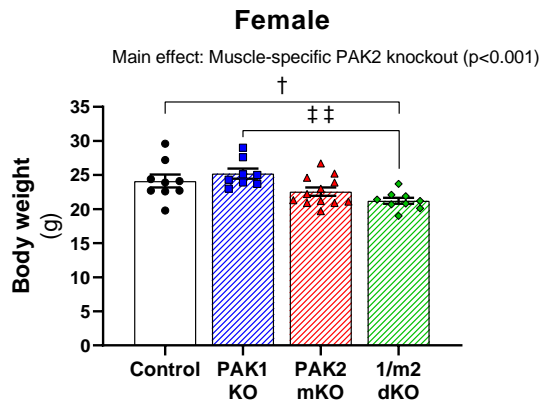

**B**

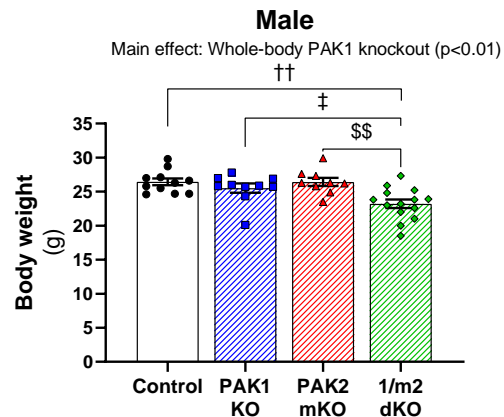

**C**

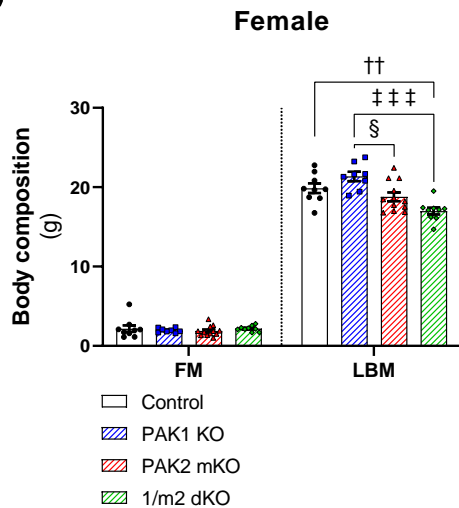

**D**

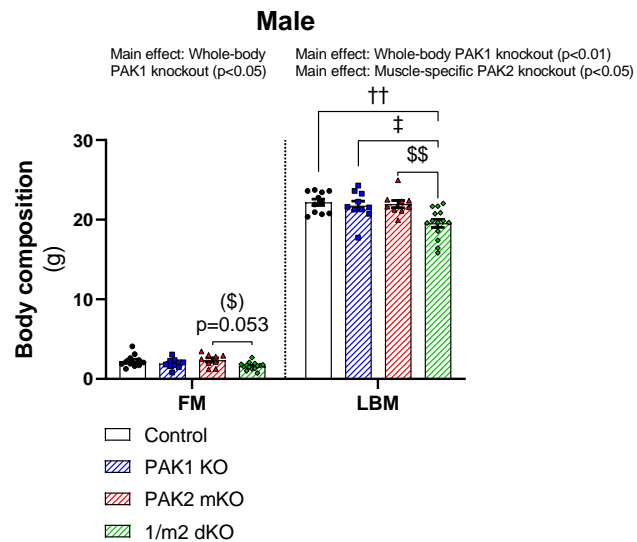

**E**

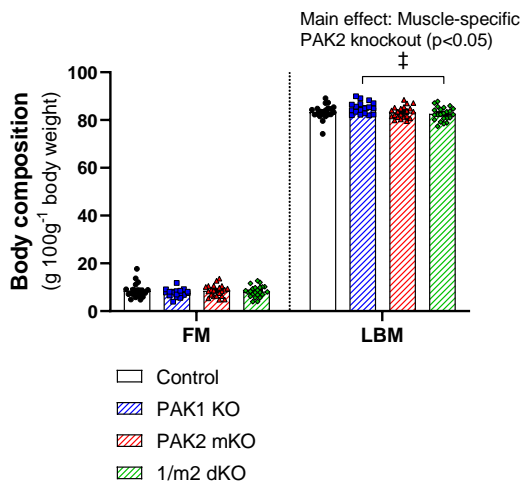

**F**

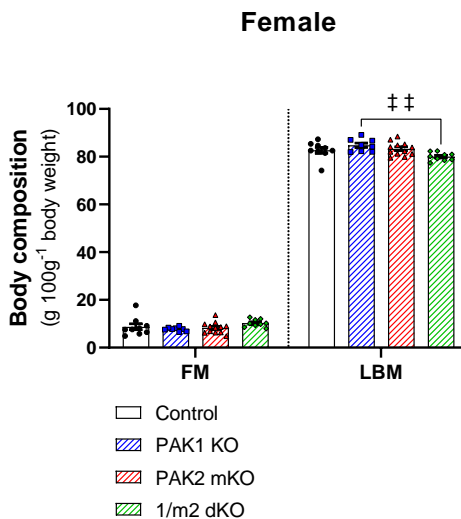

**G**

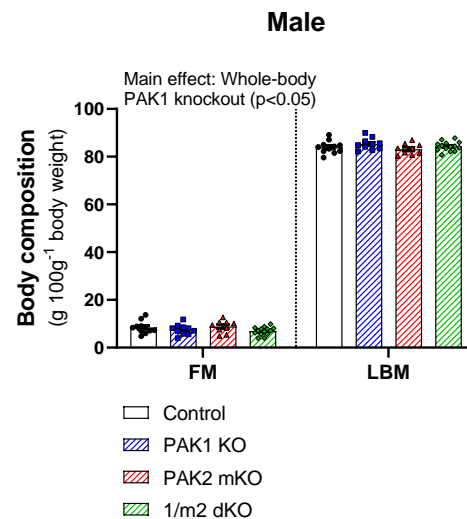

# Figure S3

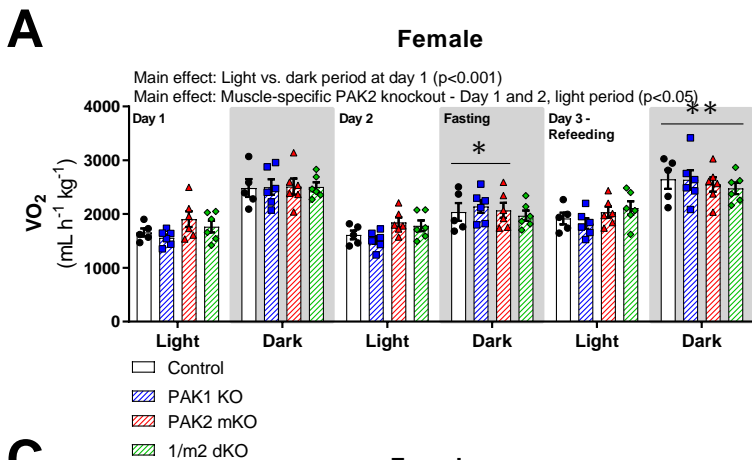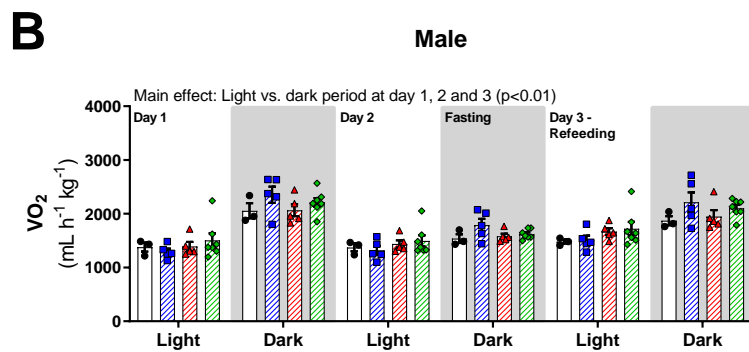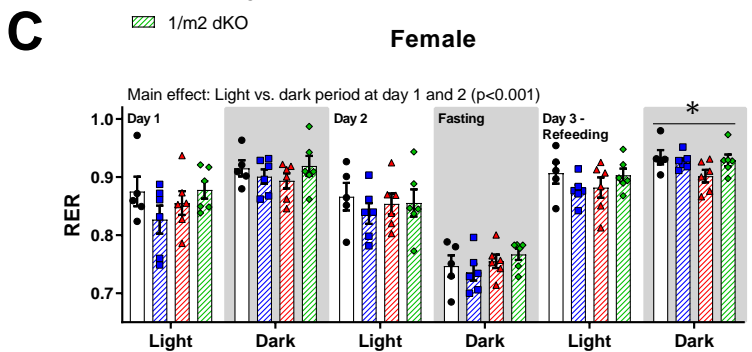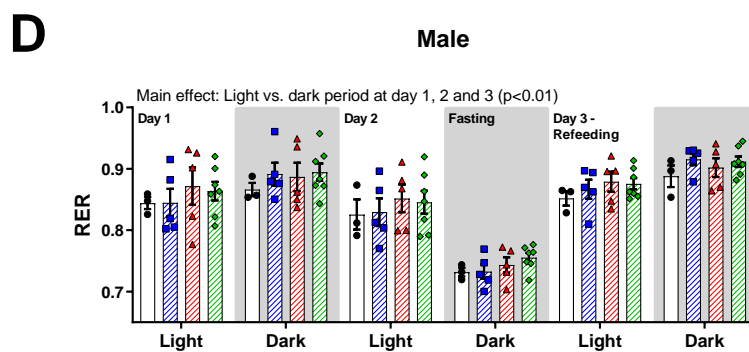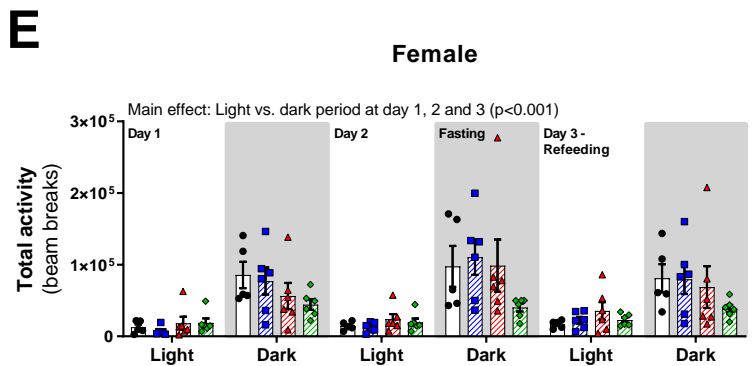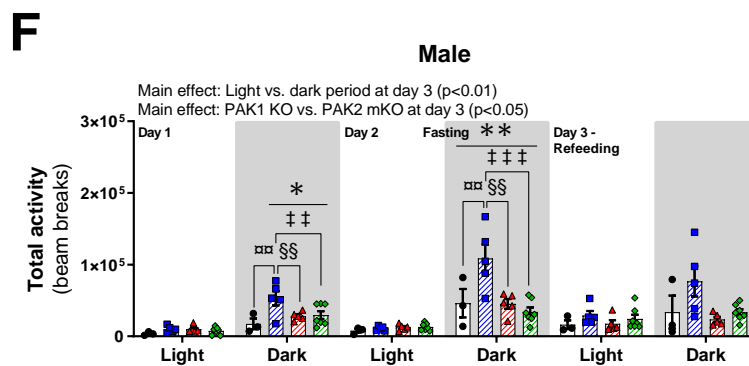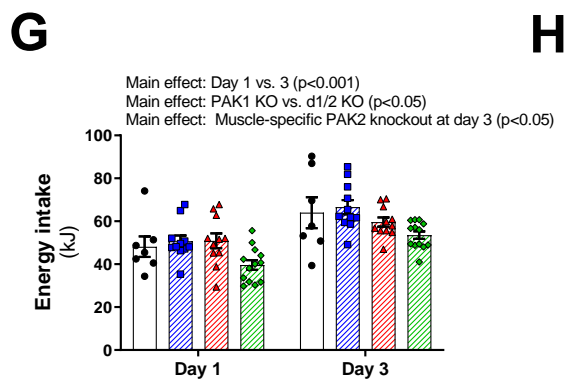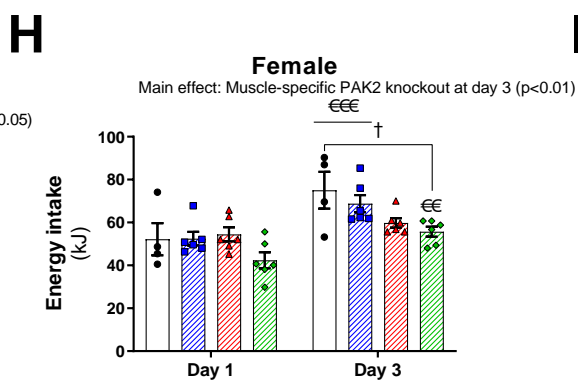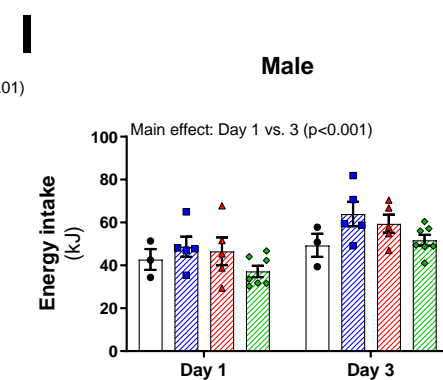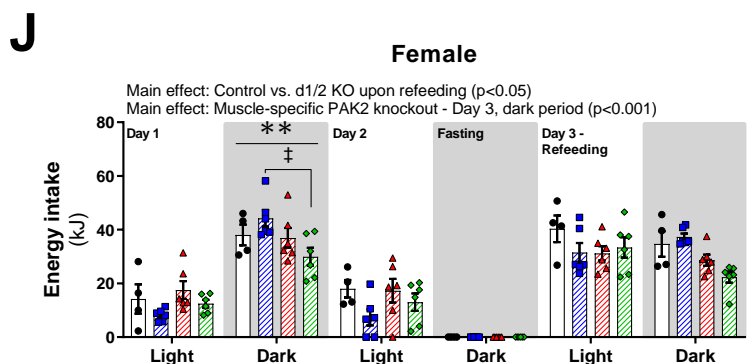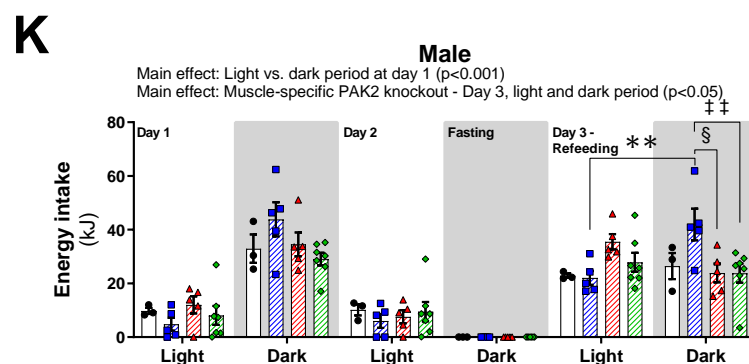

# Figure S4

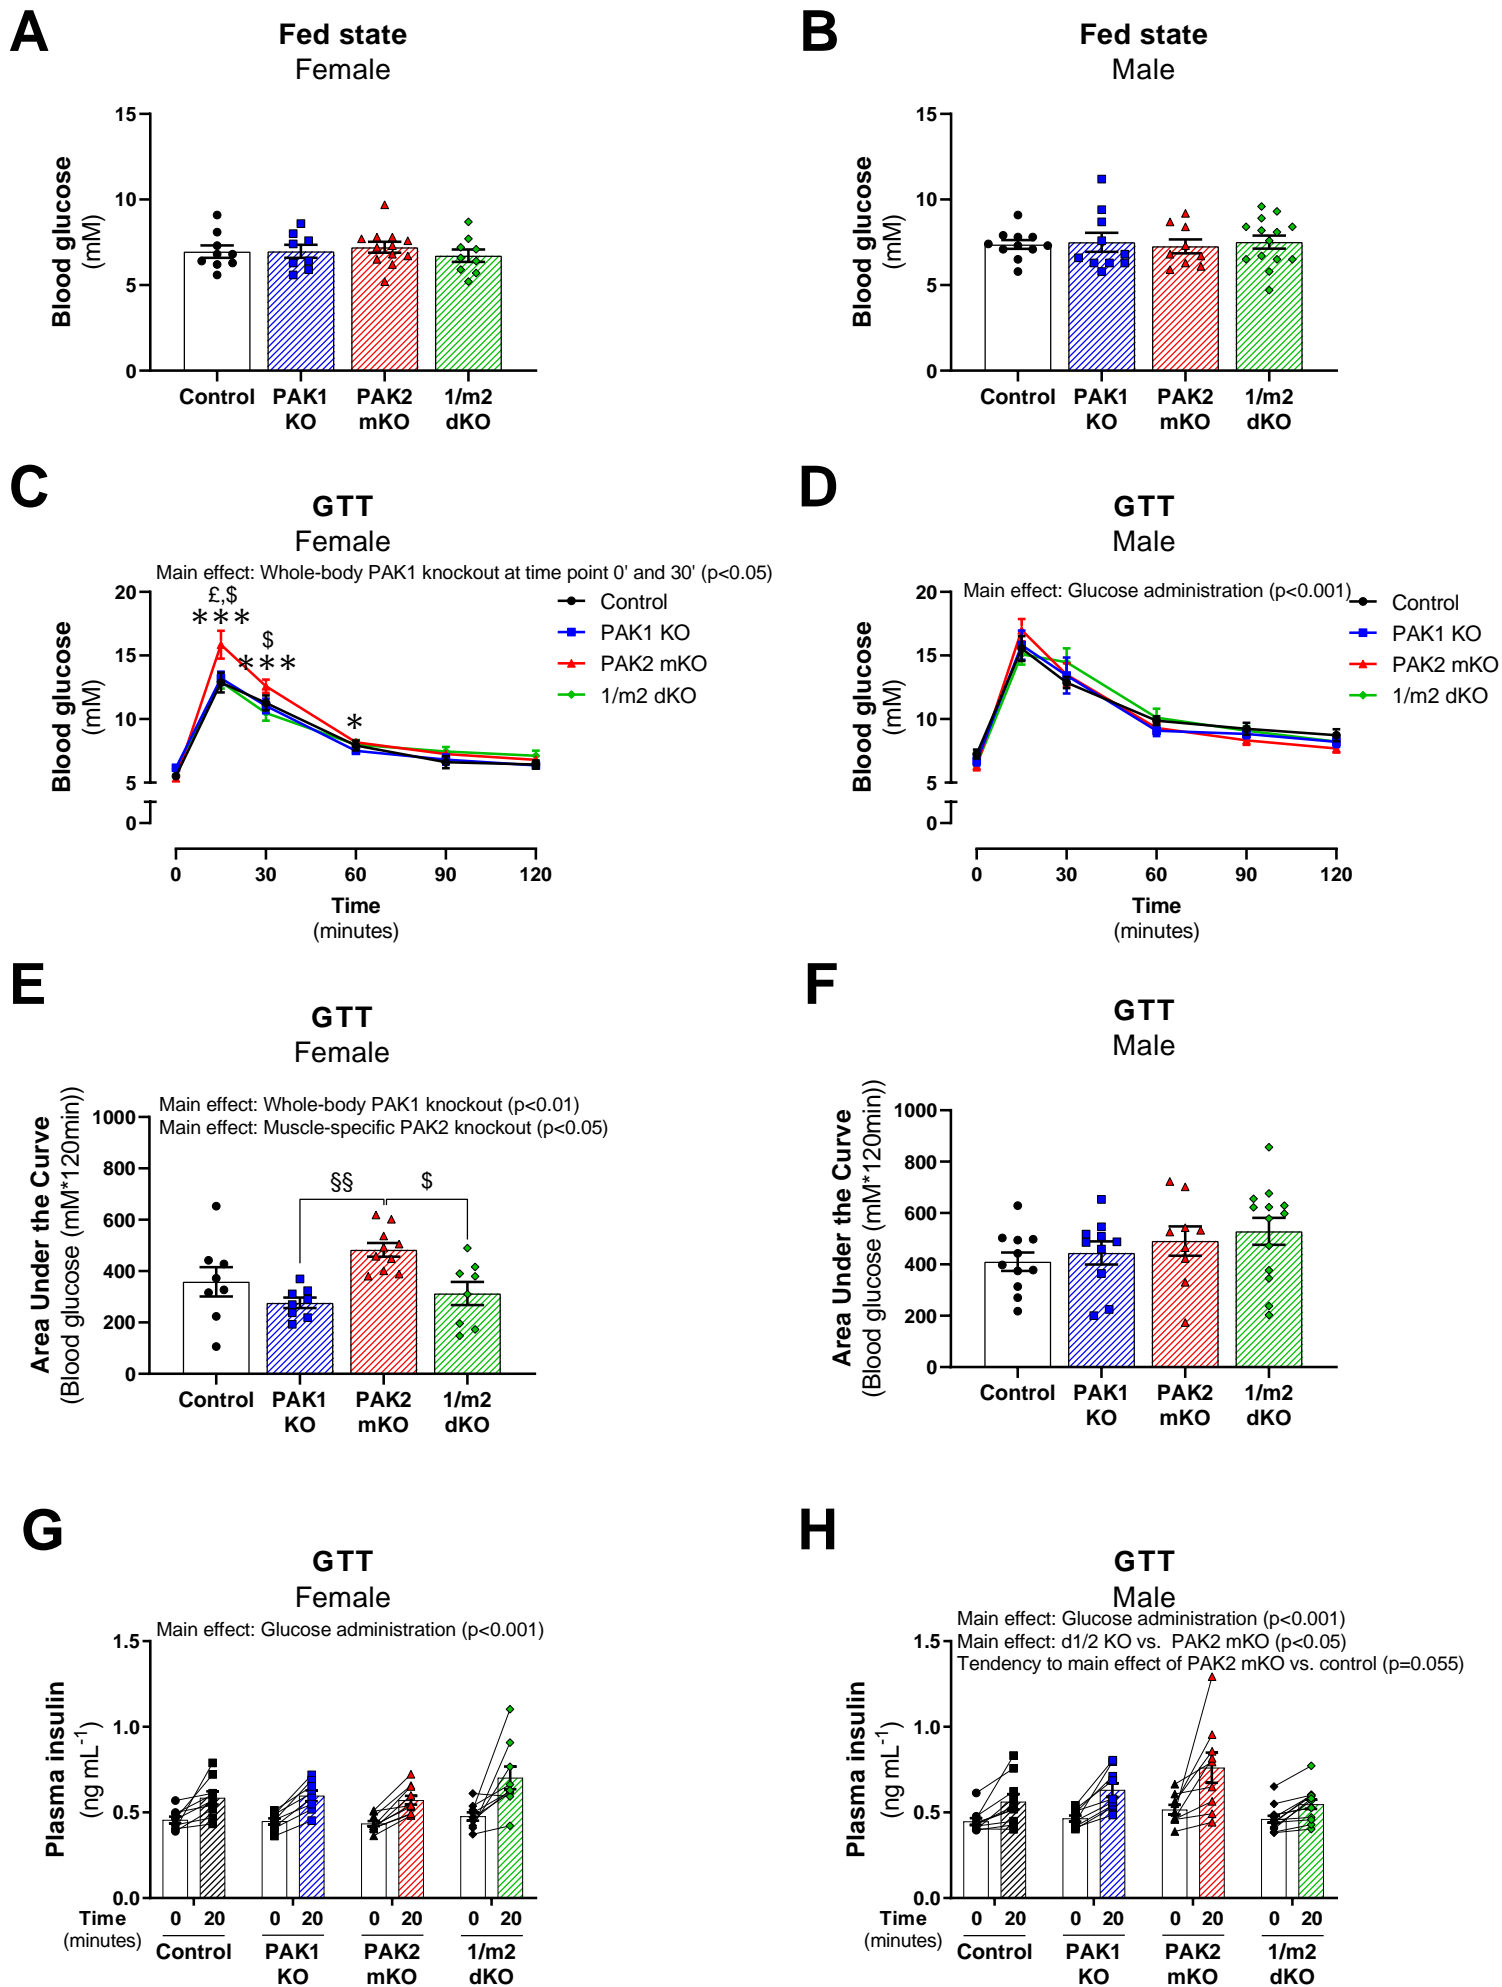

# Figure S5

## A

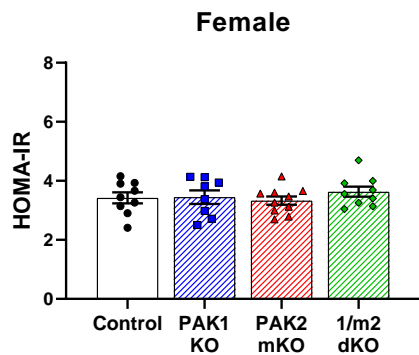

## B

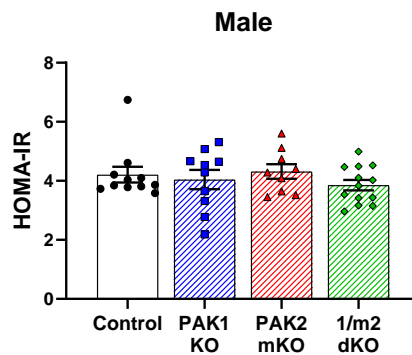

## C

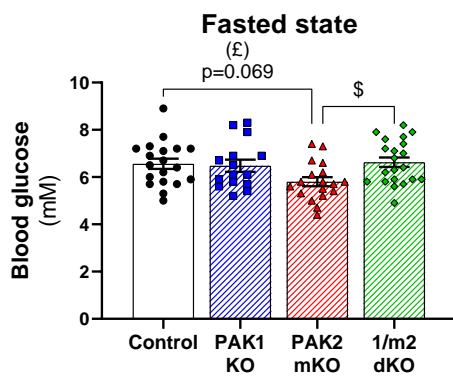

## D

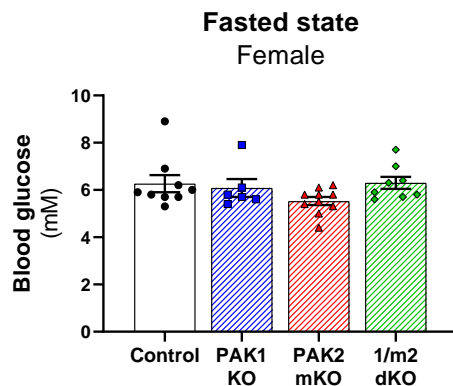

## E

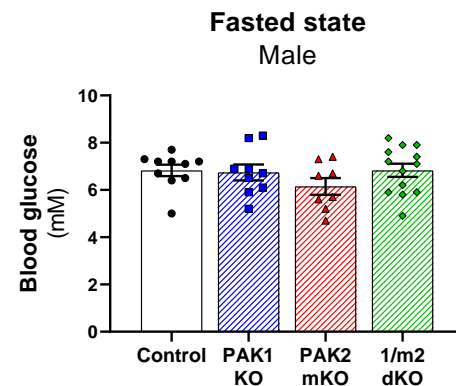

## F

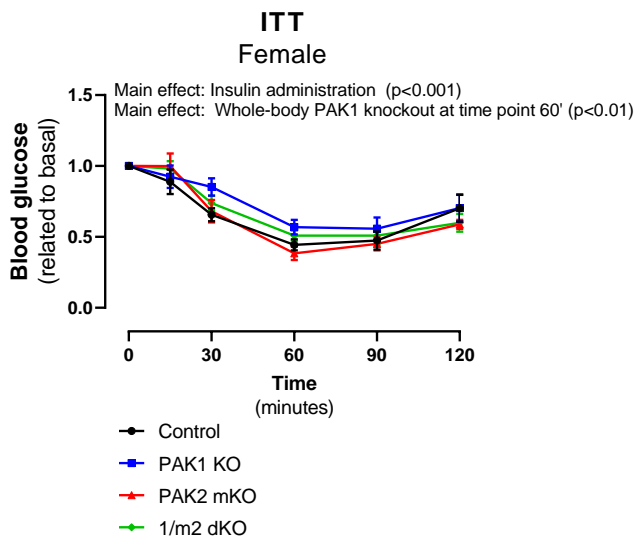

## G

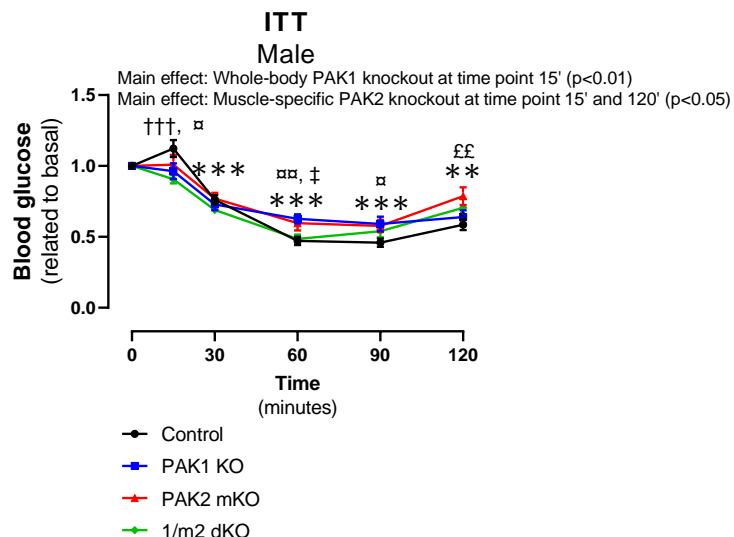

**Figure S6**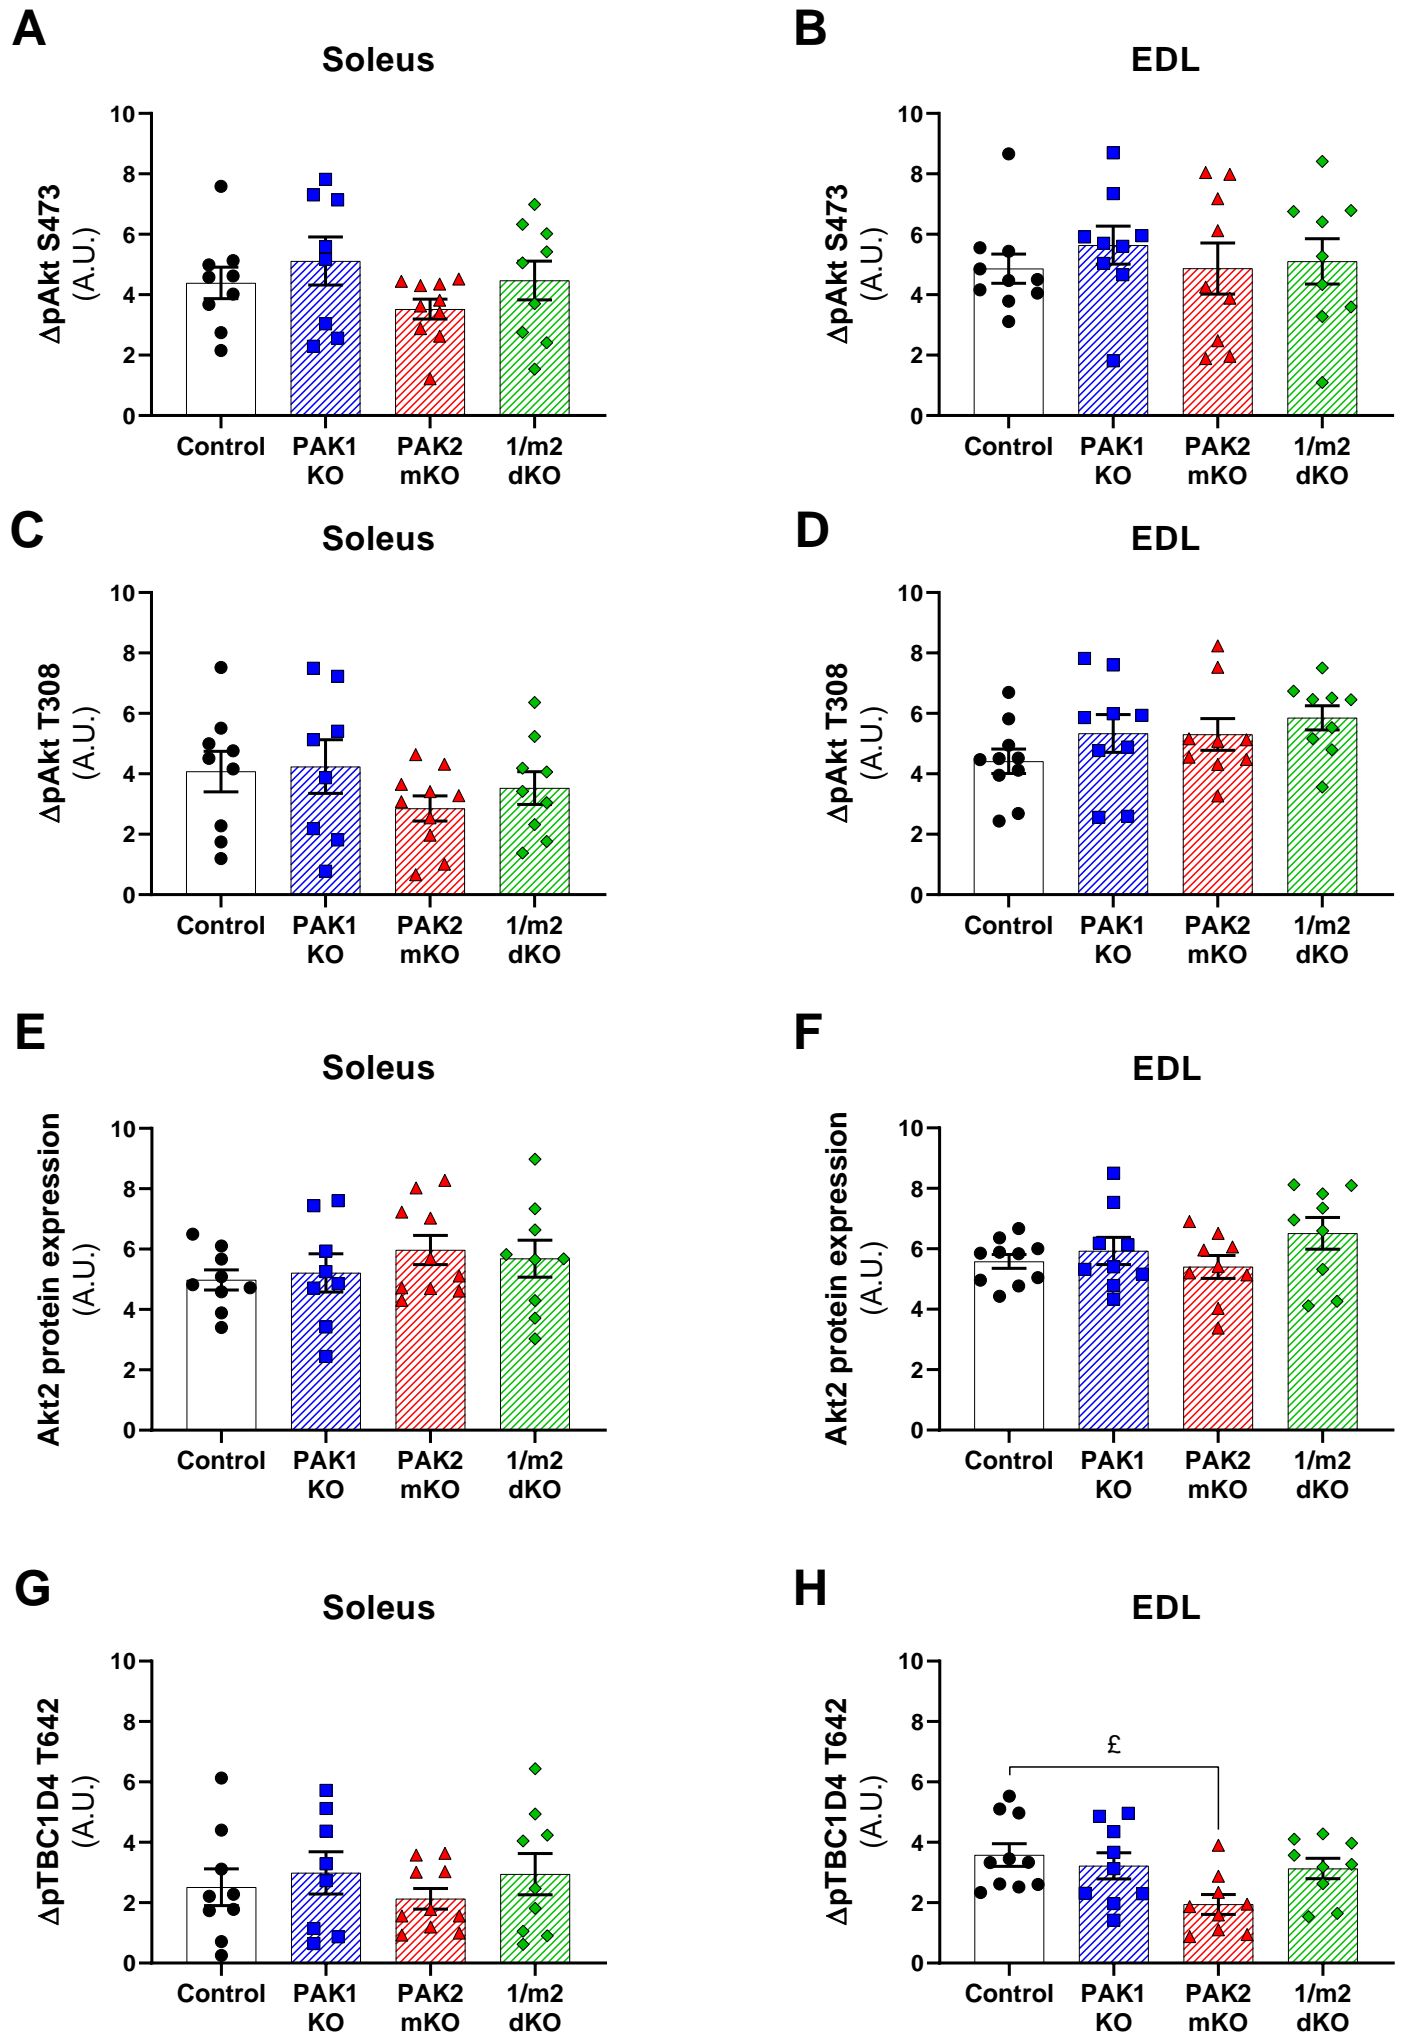

**Table 1.** Antibody Table

| <b>Antibody name</b> | <b>Antibody ID (RRID)</b> | <b>Manufacturer; Catalog Number;</b>  | <b>Species Raised in; Monoclonal or Polyclonal</b> | <b>Antibody dilution</b> | <b>Blocking buffer</b> |
|----------------------|---------------------------|---------------------------------------|----------------------------------------------------|--------------------------|------------------------|
| Akt2                 | AB_2225186                | Cell Signaling Technology;<br>3063    | Rabbit;<br>Monoclonal antibody                     | 1:1000                   | 2% milk                |
| pAkt S473            | AB_329825                 | Cell Signaling Technology;<br>9271    | Rabbit;<br>Polyclonal antibody                     | 1:1000                   | 2% milk                |
| pAkt T308            | AB_329828                 | Cell Signaling Technology;<br>9275    | Rabbit;<br>Polyclonal antibody                     | 1:1000                   | 2% milk                |
| GLUT4                | AB_2191454                | Thermo Fisher Scientific;<br>PA1-1065 | Rabbit;<br>Polyclonal antibody                     | 1:1000                   | 2% milk                |
| PAK1                 | AB_330222                 | Cell Signaling Technology;<br>2602    | Rabbit;<br>Polyclonal antibody                     | 1:1000                   | 2% milk                |
| PAK2                 | AB_2283388                | Cell Signaling Technology;<br>2608    | Rabbit;<br>Polyclonal antibody                     | 1:1000                   | 2% milk                |
| pPAK1/2 T423/402     | AB_330220                 | Cell Signaling Technology;<br>2601    | Rabbit;<br>Polyclonal antibody                     | 1:1000                   | 5% BSA                 |
| TBC1D4               | AB_492639                 | Millipore;<br>07-741                  | Rabbit;<br>Polyclonal antibody                     | 1:1000                   | 2% milk                |
| pTBC1D4 T642         | AB_2651042                | Cell Signaling Technology;<br>8881    | Rabbit;<br>Monoclonal antibody                     | 1:1000                   | 2% milk                |
